# Supplementary material for: Fluorescent probes guided by a new practical performance regulation strategy to monitor glutathione in living systems
Source: Royal Society of Chemistry journal article supplement (doi:10.1039/c8sc03421d), 2018-01-01
Supplement: c8sc03421d1.pdf [file c8sc03421d1.pdf]

## Supporting Information for

### Fluorescent probes guided by new practical performance regulation strategy to monitor glutathione in living systems

Mengyao She, ‡<sup>a, b</sup> Zhaohui Wang, ‡<sup>a</sup> Tianyou Luo, <sup>a</sup> Bing Yin, <sup>a</sup> Ping Liu, <sup>a</sup> Jing Liu, <sup>b</sup>  
Fulin Chen, <sup>b, \*</sup> Shengyong Zhang, <sup>a</sup> and Jianli Li <sup>a, \*</sup>

<sup>a</sup> Ministry of Education Key Laboratory of Synthetic and Natural Functional Molecule Chemistry,  
College of Chemistry & Materials Science, Northwest University, Xi'an, Shaanxi 710127, P. R. China.

<sup>b</sup> Key Laboratory of Resource Biology and Modern Biotechnology in Western China, Ministry of  
Education, Northwest University, 229 TaiBai North Road, Xi'an, Shaanxi Province, 710069, PR China.

1. Experimental procedures and characterisation data
2. Optical properties of designed GSH probes
3. Photo stability of the positively-guided GSH probes
4. Cytotoxicity test
5. Living mice imaging
6. Computational details
7. NMR, MS spectra of all synthesized compounds

## 1. Experimental procedures and characterisation data

### 1.1 Materials

The absorbance spectra were measured on a Shimadzu UV-1700 spectrophotometer. Fluorescent spectra data were recorded by a Hitachi F-4500 fluorescence spectrophotometer equipped with a xenon discharge lamp and 1 cm quartz cell. NMR spectra were collected on a Bruker-AVANCE III 400 MHz spectrometer (at 400 MHz for  $^1\text{H}$  and 100 MHz for  $^{13}\text{C}$ ) using tetramethylsilane (TMS) as the internal standard. Mass spectra were performed with Bruker micrOTOF-Q II ESI-Q-TOF LC/MS/MS Spectroscopy. Bioimaging of the sensors was performed on an Olympus FV1000 confocal microscope and the excitation wavelength was set at 488 nm. Flow cytometric analysis was carried out on BD Biosciences AccuriC6 and live mouse imaging was performed on PerkinElmer Lumina LT Series III. Isoflurane was used for anesthesia. All the live subjects procedures were conducted in accordance with the Experimental Animal Administration regulations issued by the State Committee of Science and Technology of the People's Republic of China and Experiments were approved by the Animal Ethics Committee of Northwest University.

Fluorescein, cinnamic acid derivatives, amino acids,  $\alpha$ -lipoic acid, and N-Ethylmaleimide were obtained from TCI (Shanghai) Development Co., Ltd. Analytical thin layer chromatography was performed using Merck 60 GF254 silica gel (pre-coated sheets, 0.25 mm thick). Silica gel (0.200-0.300 mm, 60 A, J&K Scientific Ltd.) was used for column chromatography.

### 1.2 Synthesis and characterization of all probes

Fluorescein was acidized with 4 mol/L hydrochloric acid, and dried in a vacuum oven at 60 °C for 4 hours for subsequent synthesis. 0.1 mmol cinnamic acid derivatives were acylated by thionyl chloride (0.2 mmol) in 50 ml dichloromethane at 0 °C and stirred for 5 h, removed the solvent and thionyl chloride by vacuum, and added 0.2 mmol triethylamine and stirred for 0.5 h, then the aforementioned acidized fluorescein (0.1 mmol) were suspended in 20 ml dichloromethane and dropped into the solution in 1 h. The mixture was stirred for another 6 h at 0 °C, then removed the solvent, and purified by column chromatography using dichloromethane : methanol (v/v) = 30:1 as eluent.

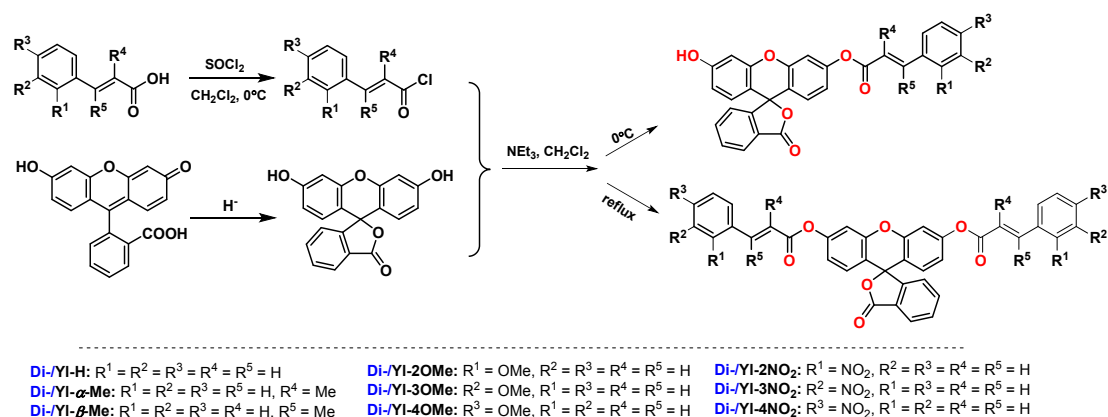

SCHEME S1. Synthesis route of all probes

The characterization data were shown as followed:

**Fl-H:** white powder, yield: 83.35 %.

<sup>1</sup>H NMR (400 MHz, d<sup>6</sup>-DMSO, TMS)  $\delta$  10.26 (s, 1H), 8.06 (d,  $J = 7.6$  Hz, 1H), 7.92 (d,  $J = 16.0$  Hz, 1H), 7.85 (t,  $J = 5.8$  Hz, 3H), 7.77 (t,  $J = 7.4$  Hz, 1H), 7.49 (d,  $J = 4.4$  Hz, 3H), 7.39 (d,  $J = 7.6$  Hz, 1H), 7.37 (s, 1H), 7.02 (d,  $J = 8.4$  Hz, 1H), 6.94 (d,  $J = 16.0$  Hz, 1H), 6.87 (d,  $J = 8.8$  Hz, 1H), 6.75 (s, 1H), 6.63 (s, 2H). <sup>13</sup>C NMR (100 MHz, d<sup>6</sup>-DMSO, TMS)  $\delta$  169.0, 165.0, 160.2, 152.8, 152.3, 152.0, 151.7, 147.5, 136.3, 134.2, 131.5, 130.8, 129.6, 129.5, 129.5, 129.2, 126.3, 125.3, 124.6, 118.6, 117.2, 117.1, 113.6, 110.9, 109.6, 102.8, 82.5, 55.4. EMS/MS  $m/z$  calcd. for C<sub>29</sub>H<sub>17</sub>O<sub>6</sub><sup>-</sup> ([M-H]<sup>-</sup>): 461.1031, found 461.1035.

**Fl- $\alpha$ -Me:** flaxen powder, yield: 79.41 %.

<sup>1</sup>H NMR (400 MHz, (CD<sub>3</sub>)<sub>2</sub>CO, TMS) 8.03 (d,  $J = 7.6$  Hz, 1H), 7.05 (s, 1H), 7.85 (t,  $J = 7.6$  Hz, 1H), 7.78 (t,  $J = 7.6$  Hz, 1H), 7.59 (d,  $J = 7.6$  Hz, 2H), 7.50 (d,  $J = 7.6$  Hz, 2H), 7.44 (d,  $J = 7.6$  Hz, 1H), 7.38 (d,  $J = 7.6$  Hz, 1H), 7.30 (s, 1H), 7.03 (d,  $J = 8.4$  Hz, 1H), 6.94 (d,  $J = 8.4$  Hz, 1H), 6.81 (s, 1H), 6.72 (q,  $J = 8.4$  Hz, 2H), 2.24 (s, 3H). <sup>13</sup>C NMR (100 MHz, (CD<sub>3</sub>)<sub>2</sub>CO, TMS)  $\delta$  168.49, 166.14, 159.56, 152.96, 152.79, 152.20, 151.76, 140.64, 138.39, 135.44, 135.39, 130.10, 129.90, 129.64, 129.33, 129.06, 128.92, 128.57, 128.44, 127.37, 126.63, 124.67, 124.09, 117.98, 117.07, 112.80, 110.38, 102.49, 81.94, 13.57. EMS/MS  $m/z$  calcd. for C<sub>30</sub>H<sub>19</sub>O<sub>6</sub><sup>-</sup> ([M-H]<sup>-</sup>): 475.1187, found 475.1311

**Fl- $\beta$ -Me:** flaxen powder, yield: 88.47 %.

<sup>1</sup>H NMR (100 MHz, CDCl<sub>3</sub>, TMS) 8.02 (d,  $J = 6.8$  Hz, 1H), 7.63 (quint,  $J = 5.6$  Hz, 2H), 7.55 (d,  $J = 3.6$  Hz, 2H), 7.43 (d,  $J = 3.2$  Hz, 2H), 7.14 (s, 1H), 7.07 (d,  $J = 7.6$  Hz, 1H), 6.82 (q,  $J = 8.4$  Hz, 2H), 6.8 (s, 1H), 6.62 (d,  $J = 8.8$  Hz, 1H), 6.52 (d,  $J = 6.8$  Hz, 1H), 6.38 (s, 1H), 6.28 (s, 1H), 2.65 (s, 3H). <sup>13</sup>C NMR (100 MHz, CDCl<sub>3</sub>, TMS)  $\delta$  170.2, 165.1, 160.2, 158.6, 153.1, 152.1, 152.0, 151.9, 141.6, 135.3, 129.9, 129.7,

129.1, 129.1, 128.7, 126.5, 126.4, 125.1, 124.1, 117.6, 116.4, 115.4, 112.8, 110.6, 110.1, 103.1, 83.4, 18.5. EMS/MS  $m/z$  calcd. for  $C_{30}H_{19}O_6^-$  ( $[M-H]^-$ ): 475.1187, found 475.1162.

**Fl-2OMe**: flaxen powder, yield: 85.97 %.

$^1H$  NMR (400 MHz,  $CDCl_3$ , TMS)  $\delta$  8.19 (d,  $J = 16.4$  Hz, 1H), 8.02 (d,  $J = 7.2$  Hz, 1H), 7.63 (quint,  $J = 6.8$  Hz, 2H), 7.57 (d,  $J = 7.6$  Hz, 1H), 7.41 (t,  $J = 7.6$  Hz, 1H), 7.16 (s, 1H), 7.08 (d,  $J = 7.2$  Hz, 1H), 7.00 (t,  $J = 7.6$  Hz, 1H), 6.96 (d,  $J = 8.0$  Hz, 1H), 6.83 (dd,  $J_1 = 14.0$  Hz,  $J_2 = 8.8$  Hz, 2H), 6.74 (d,  $J = 16.4$  Hz, 1H), 6.69 (s, 1H), 6.63 (d,  $J = 8.8$  Hz, 1H), 6.53 (d,  $J = 8.4$  Hz, 1H), 6.27 (br, 1H), 3.93 (s, 3H).  $^{13}C$  NMR (100 MHz,  $(CD_3)_2CO$ , TMS)  $\delta$  168.5, 164.8, 159.6, 158.7, 152.9, 152.5, 152.2, 151.7, 142.0, 135.4, 132.5, 130.1, 129.3, 129.2, 129.0, 126.6, 124.7, 124.1, 122.6, 120.8, 117.9, 117.0, 116.9, 112.8, 111.6, 110.3, 102.6, 82.0, 55.2. EMS/MS  $m/z$  calcd. for  $C_{30}H_{19}O_7^-$  ( $[M-H]^-$ ): 491.1136, found 491.1149.

**Fl-3OMe**: flaxen powder, yield: 87.67 %.

$^1H$  NMR (400 MHz,  $CDCl_3$ , TMS)  $\delta$  8.03 (d,  $J = 6.8$  Hz, 1H), 8.03 (d,  $J = 6.8$  Hz, 1H), 7.87 (d,  $J = 16$  Hz, 1H), 7.74 (quint,  $J = 7.2$  Hz, 2H), 7.35 (s, 1H), 7.19 (d,  $J = 7.6$  Hz, 1H), 7.08-7.12 (m, 2H), 6.99 (d,  $J = 7.6$  Hz, 1H), 6.80-6.87 (m, 2H), 6.69 (s, 1H), 6.64 (s, 1H), 6.61 (d,  $J = 5.2$  Hz, 1H), 6.53 (d,  $J = 8.8$  Hz, 1H), 6.16 (s, 1H), 3.86 (s, 3H).  $^{13}C$  NMR (100 MHz,  $(CD_3)_2CO$ , TMS)  $\delta$  168.5, 164.4, 160.2, 159.6, 152.9, 152.6, 152.4, 152.2, 151.8, 146.9, 135.5, 135.4, 130.1, 130.0, 129.3, 129.1, 126.6, 124.7, 124.1, 121.2, 117.9, 117.1, 117.1, 113.0, 112.9, 110.4, 110.3, 102.6, 82.0, 54.8. EMS/MS  $m/z$  calcd. for  $C_{30}H_{19}O_7^-$  ( $[M-H]^-$ ): 491.1136, found 491.1173.

**Fl-4OMe**: yellow powder, yield: 85.42 %.

$^1H$  NMR (400 MHz,  $CDCl_3$ , TMS)  $\delta$  8.02 (d,  $J = 6.0$  Hz, 1H), 7.86 (d,  $J = 16$  Hz, 1H), 7.63 (quint,  $J = 5.8$  Hz, 2H), 7.56 (d,  $J = 8.8$  Hz, 2H), 7.15 (s, 1H), 7.04 (d,  $J = 5.6$  Hz, 1H), 6.95 (d,  $J = 8.8$  Hz, 2H), 6.79-6.86 (m, 2H), 6.67 (s, 1H), 6.62 (d,  $J = 8.4$  Hz, 1H), 6.48-6.54 (m, 2H), 6.31 (s, 1H), 3.86 (s, 3H).  $^{13}C$  NMR (100 MHz,  $(CD_3)_2CO$ , TMS)  $\delta$  168.51, 164.67, 162.11, 159.57, 152.92, 152.51, 152.20, 151.72, 146.74, 135.39, 130.39, 130.09, 129.82, 129.31, 129.00, 126.75, 126.63, 124.67, 124.09, 117.93, 116.96, 114.45, 114.30, 113.93, 112.82, 110.31, 102.53, 81.99, 54.95. EMS/MS  $m/z$  calcd. for  $C_{30}H_{19}O_7^-$  ( $[M-H]^-$ ): 491.1136, found 491.1135.

**Fl-2NO<sub>2</sub>**: yellow powder, yield: 74.43 %.

$^1H$  NMR (400 MHz,  $(CD_3)_2CO$ , TMS)  $\delta$  9.11 (s,  $J = 6.0$  Hz, 1H), 8.28 (d,  $J = 16$  Hz, 1H), 8.15 (d,  $J = 8.0$  Hz, 1H), 8.04 (t,  $J = 8.0$  Hz, 2H), 7.86 (q,  $J = 7.6$  Hz, 2H), 7.77 (t,  $J = 8.4$  Hz, 2H), 7.38 (d,  $J = 8.4$  Hz, 1H), 7.30 (s, 1H), 7.03 (d,  $J = 6.4$  Hz, 1H), 6.95

(d,  $J = 8.4$  Hz, 1H), 6.81 (t,  $J = 8.0$  Hz, 2H), 6.70 (q,  $J = 8.8$  Hz, 2H).  $^{13}\text{C}$  NMR (100 MHz,  $(\text{CD}_3)_2\text{CO}$ , TMS)  $\delta$  168.45, 163.68, 159.60, 159.49, 152.91, 152.17, 151.76, 148.81, 142.08, 135.40, 133.86, 131.21, 130.11, 129.56, 129.43, 129.32, 129.16, 126.62, 124.84, 124.67, 124.10, 121.48, 117.77, 117.35, 112.86, 112.78, 110.35, 110.26, 102.52, 102.46, 81.88. EMS/MS  $m/z$  calcd. for  $\text{C}_{29}\text{H}_{16}\text{NO}_8^-$  ( $[\text{M}-\text{H}]^-$ ): 506.0881, found 506.0913.

**Fl-3NO<sub>2</sub>**: yellow powder, yield: 72.94%.

$^1\text{H}$  NMR (400 MHz,  $(\text{CD}_3)_2\text{CO}$ , TMS)  $\delta$  9.81 (s, 1H), 8.24 (s, 1H), 7.87 (t,  $J = 8.0$  Hz, 2H), 7.62 (d,  $J = 10.0$  Hz, 1H), 7.59 (s, 1H), 7.38 (t,  $J = 7.2$  Hz, 1H), 7.31 (t,  $J = 7.6$  Hz, 2H), 6.92 (t,  $J = 10.0$  Hz, 2H), 6.62 (d,  $J = 16.0$  Hz, 1H), 6.57 (d,  $J = 8.8$  Hz, 1H), 6.42 (d,  $J = 8.4$  Hz, 1H), 6.29 (s, 1H), 6.17 (s, 2H).  $^{13}\text{C}$  NMR (100 MHz,  $(\text{CD}_3)_2\text{CO}$ , TMS)  $\delta$  168.5, 164.0, 159.7, 152.9, 152.2, 152.2, 151.8, 148.9, 144.3, 143.5, 136.0, 135.4, 134.2, 130.4, 130.1, 129.4, 129.3, 129.2, 126.6, 124.9, 124.7, 124.5, 124.4, 124.1, 123.8, 123.0, 120.8, 120.0, 118.3, 117.8, 117.3, 112.9, 110.3, 102.6. EMS/MS  $m/z$  calcd. for  $\text{C}_{29}\text{H}_{16}\text{NO}_8^-$  ( $[\text{M}-\text{H}]^-$ ): 506.0881, found 506.0931.

**Fl-4NO<sub>2</sub>**: yellow powder, yield: 76.57 %.

$^1\text{H}$  NMR (400 MHz,  $(\text{CD}_3)_2\text{CO}$ , TMS) 10.28 (s, 1H), 8.31 (d,  $J = 8.8$  Hz, 2H), 8.14 (d,  $J = 8.8$  Hz, 1H), 8.06 (t,  $J = 7.2$  Hz, 2H), 7.87-7.76 (m, 3H), 7.39 (s, 2H), 7.17 (d,  $J = 16$  Hz, 1H), 7.04 (d,  $J = 6.8$  Hz, 1H), 6.89 (d,  $J = 8.8$  Hz, 1H), 6.76 (s, 1H), 6.43 (s, 2H).  $^{13}\text{C}$  NMR (100 MHz,  $(\text{CD}_3)_2\text{CO}$ , TMS)  $\delta$  168.50, 163.83, 159.59, 152.89, 152.16, 151.74, 148.82, 144.10, 144.03, 140.31, 135.41, 130.12, 129.49, 129.30, 129.14, 126.60, 124.70, 124.07, 124.01, 121.13, 117.76, 117.30, 112.87, 110.37, 110.25, 102.54, 81.92. EMS/MS  $m/z$  calcd. for  $\text{C}_{29}\text{H}_{16}\text{NO}_8^-$  ( $[\text{M}-\text{H}]^-$ ): 506.0881, found 506.0933.

### 1.3 Theoretical simulation method

DFT calculations have been applied to simulate the recognition process to compare the properties of these probes. All the calculations were performed with functional B3LYP<sup>36</sup> for stable structures and UB3LYP for free radicals, with a combination of double- $\zeta$  quality consisting of 6-31G\* for C, H elements and 6-31+G\*\* for N, O, S elements on Gaussian 09 Program<sup>37</sup>. The optimized structures were confirmed to be local minimums due to the non-existence of imaginary frequency. The environmental effect was included via the PCM model with water as the solvent molecule.

### 1.4 Solution preparation procedure

All the reagent grade chemicals consumed in this work were procured from commercial sources and used as received. Stock solutions of all probes (200  $\mu\text{M}$ ) were

prepared in DMSO. Stock solutions of all analytes (2 mM) were prepared in 0.1 M PBS, pH=7.4.

To a 10 mL volumetric tube, 1 mL of 200  $\mu$ M probe and different volume of GSH (2 mM in 0.1M PBS) were added. The mixture was diluted to 10 mL with 0.1 M PBS. Then, 3.0 mL of each solution was transferred to a 1 cm quartz cell. The fluorescence data was recorded between 480 nm-700 nm. The excitation and emission wavelength of slit width were both set at 5.0 nm and the excitation wavelength was set at 470 nm.

## 2. Optical properties of designed GSH probes

### 2.1 pH stability

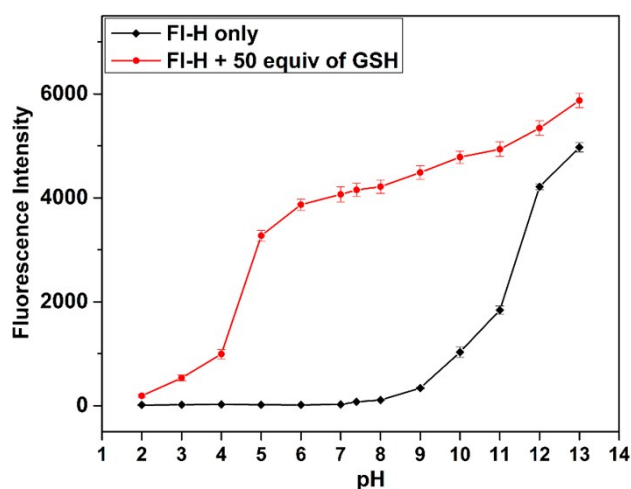

Figure S1. pH stability of FI-H

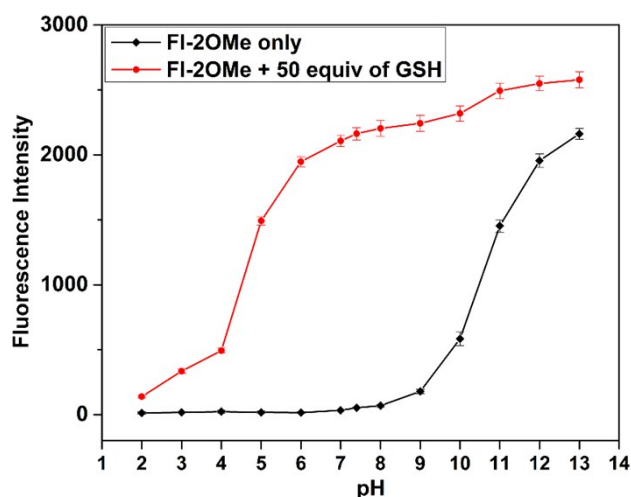

Figure S2. pH stability of FI-2OMe

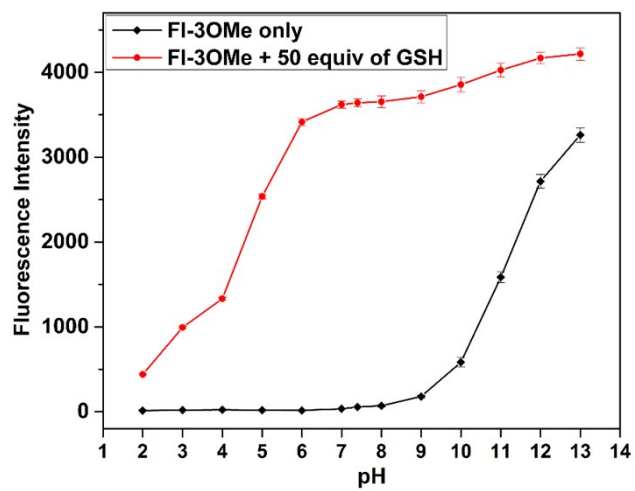

Figure S3. pH stability of FI-3OMe

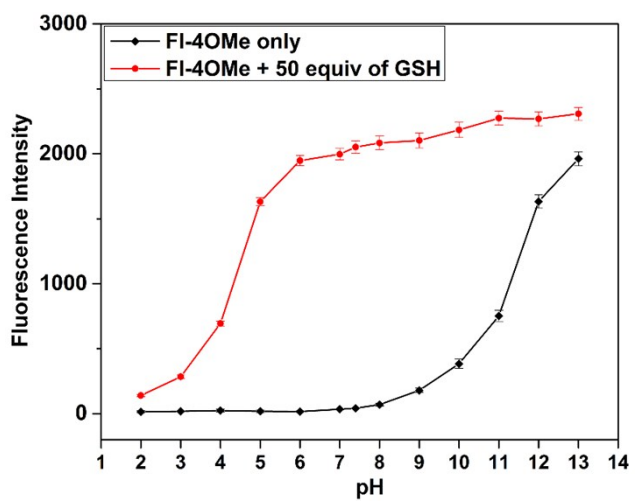

Figure S4. pH stability of FI-4OMe

## 2.2 selectivity and competition experiments

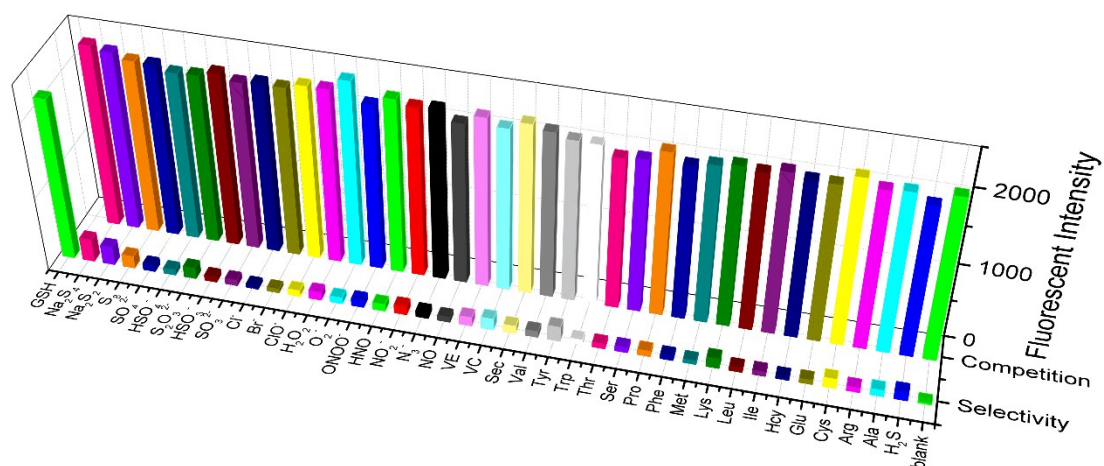

Figure S5. selectivity and competition experiment of FI-2OMe

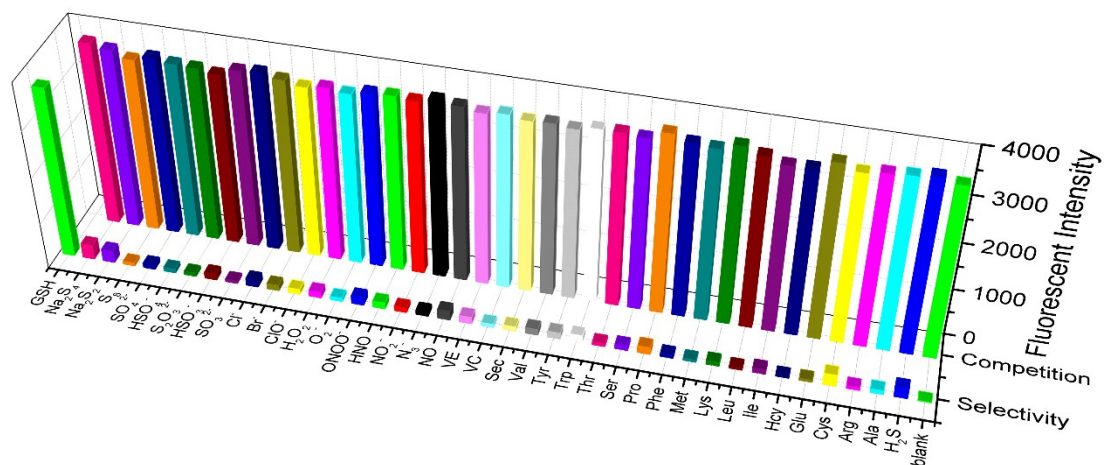

Figure S6. selectivity and competition experiment of FI-3OMe

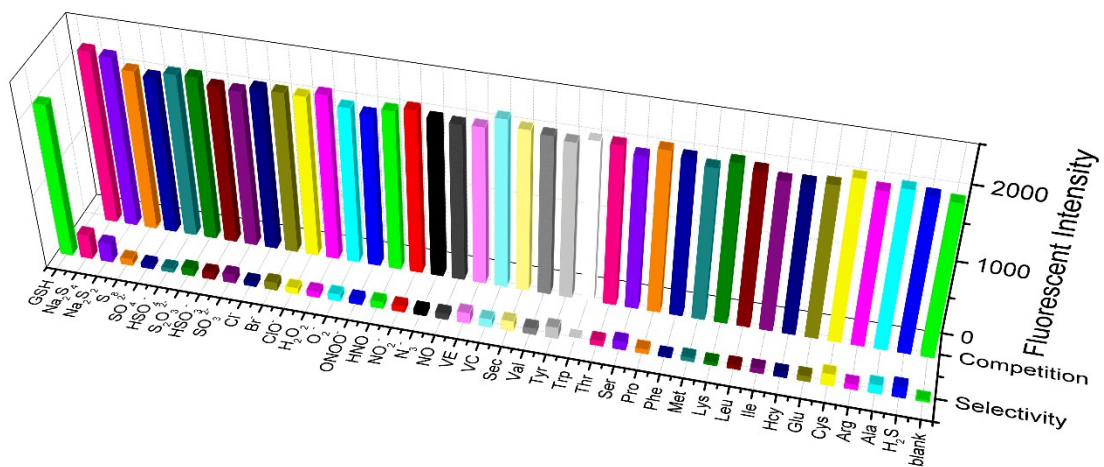

Figure S7. selectivity and competition experiment of FI-4OMe



### 2.3 Titration experiments

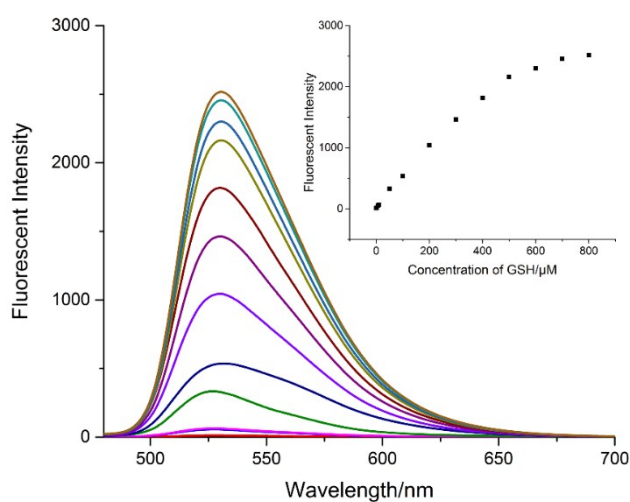

**Figure S8.** Fluorescence spectrum changes of **FI-2OMe** upon addition of GSH (0-80 equiv.)

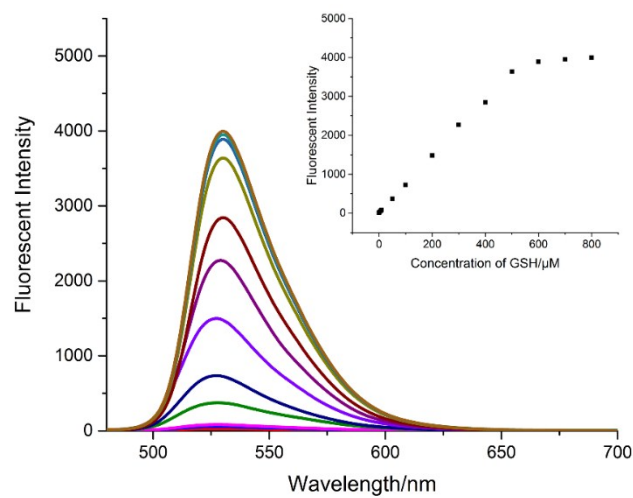

**Figure S9.** Fluorescence spectrum changes of **FI-3OMe** upon addition of GSH (0-80 equiv.)

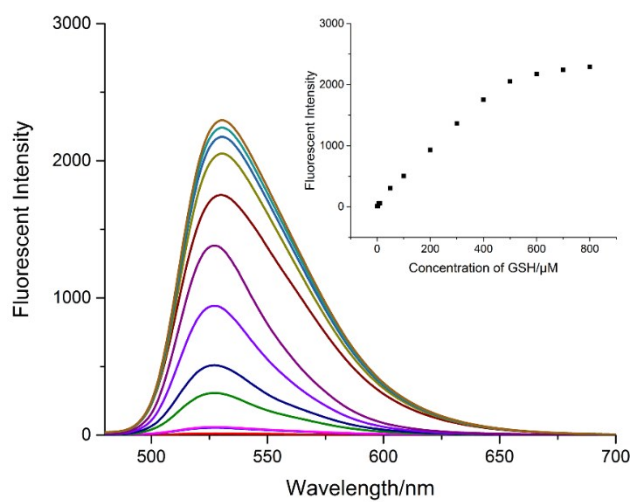

**Figure S10.** Fluorescence spectrum changes of **FI-4OMe** upon addition of GSH (0-80 equiv.)

## 2.4 linear relationship between probes and GSH

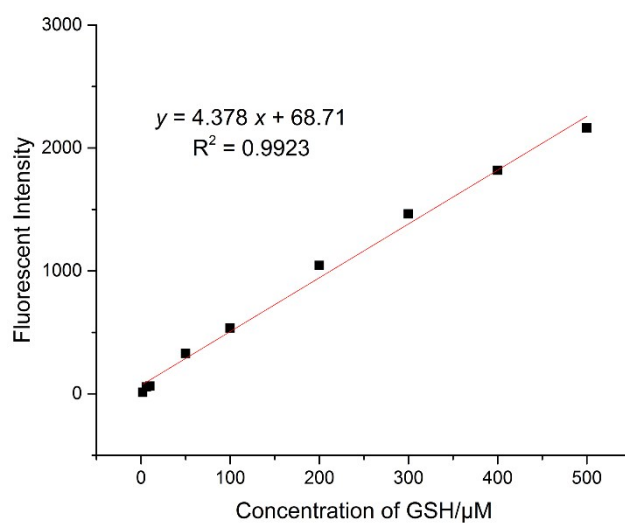

**Figure S11.** Linear relationship between **FI-2OMe** and GSH (0-50 equiv.)

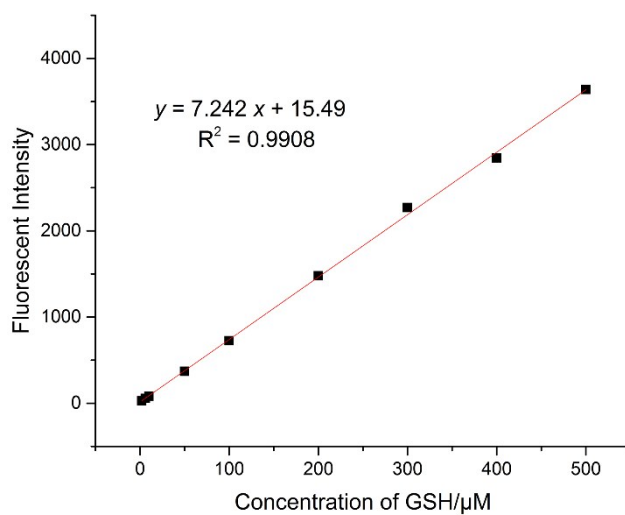

**Figure S12.** Linear relationship between **FI-3OMe** and GSH (0-50 equiv.)

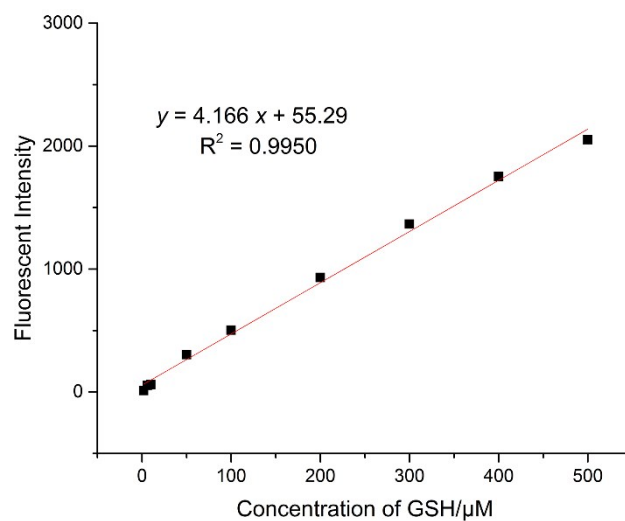

**Figure S13.** Linear relationship between **FI-4OMe** and GSH (0-50 equiv.)

## 2.5 Time-depended experiments

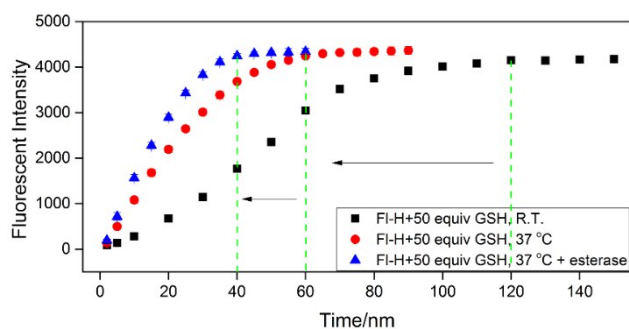

**Figure S14** Time-depended experiment of **FI-H** in room temperature, 37 °C and 37 °C with esterase.

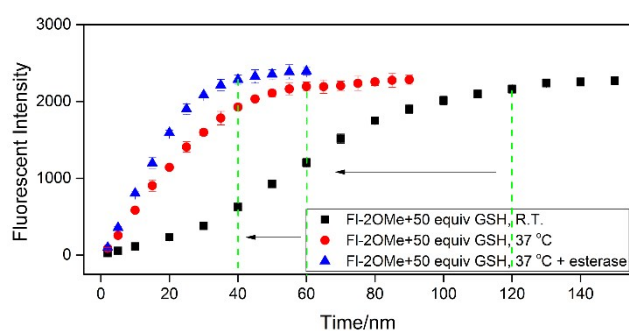

**Figure S15** Time-depended experiment of **FI-2OMe** in room temperature, 37 °C and 37 °C with esterase.

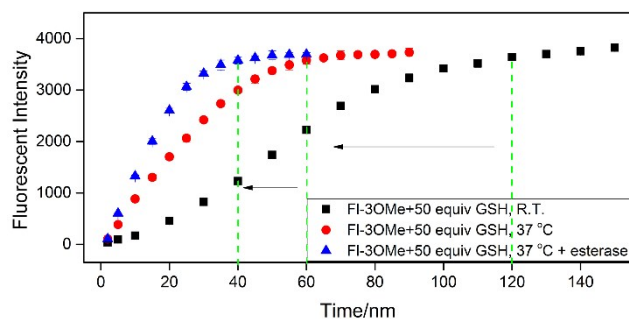

**Figure S16** Time-depended experiment of **FI-3OMe** in room temperature, 37 °C and 37 °C with esterase.

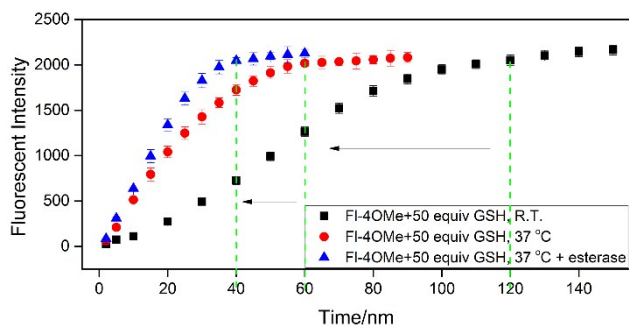

**Figure S17** Time-depended experiment of **FI-4OMe** in room temperature, 37 °C and 37 °C with esterase.

### 3. Photo stability designed GSH probes

#### 3.1 Photo stability in-vitro

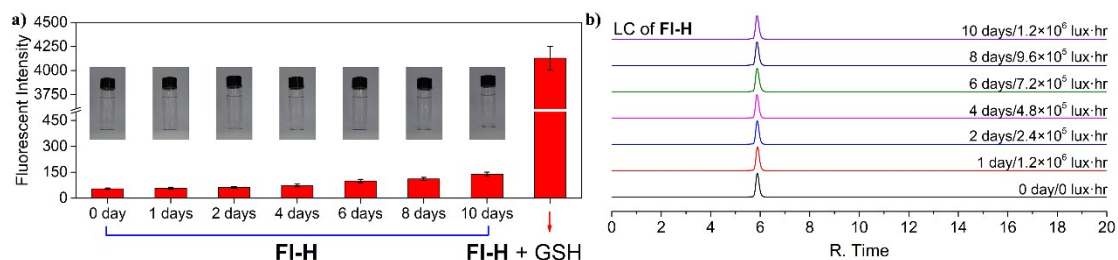

**Figure S18** Photo stability of **FI-H** in-vitro. a) Fluorescent intensity changes; b) LC changes.

Under illumination for 10 days with a total illuminance of  $1.2 \times 10^6$  lux·hr.

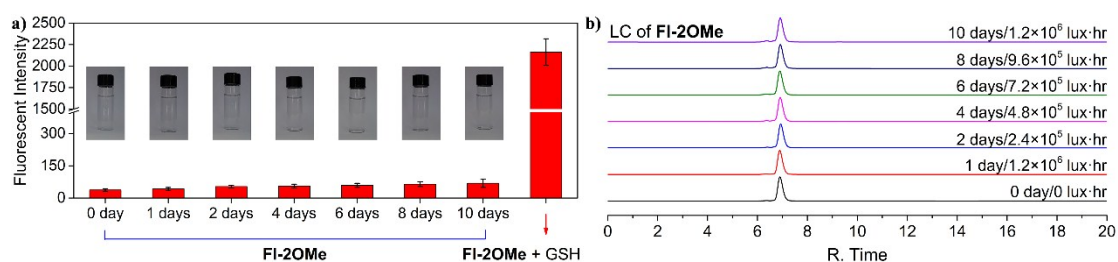

**Figure S19** Photo stability of **FI-2OMe** in-vitro. a) Fluorescent intensity changes; b) LC changes.

Under illumination for 10 days with a total illuminance of  $1.2 \times 10^6$  lux·hr.

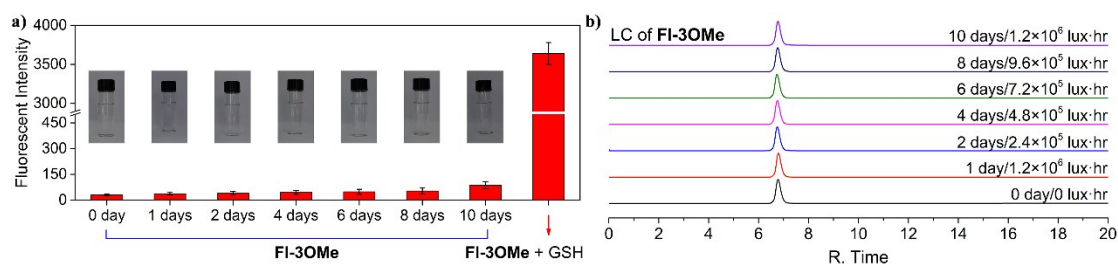

**Figure S20** Photo stability of **FI-3OMe** in-vitro. a) Fluorescent intensity changes; b) LC changes.

Under illumination for 10 days with a total illuminance of  $1.2 \times 10^6$  lux·hr.

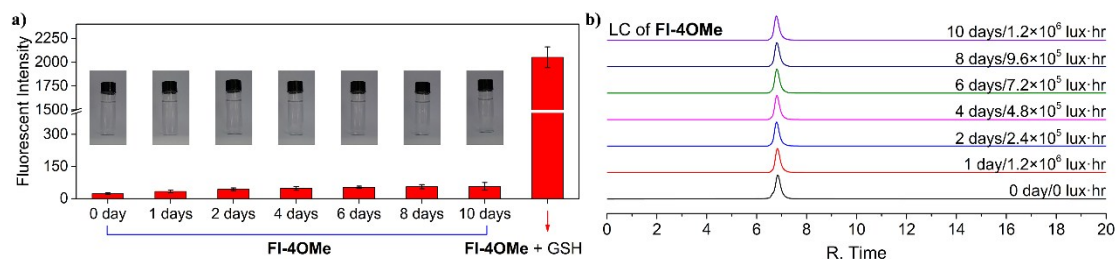

**Figure S21** Photo stability of **FI-4OMe** in-vitro. a) Fluorescent intensity changes; b) LC changes.

Under illumination for 10 days with a total illuminance of  $1.2 \times 10^6$  lux·hr.

### 3.2 Photo stability in cells

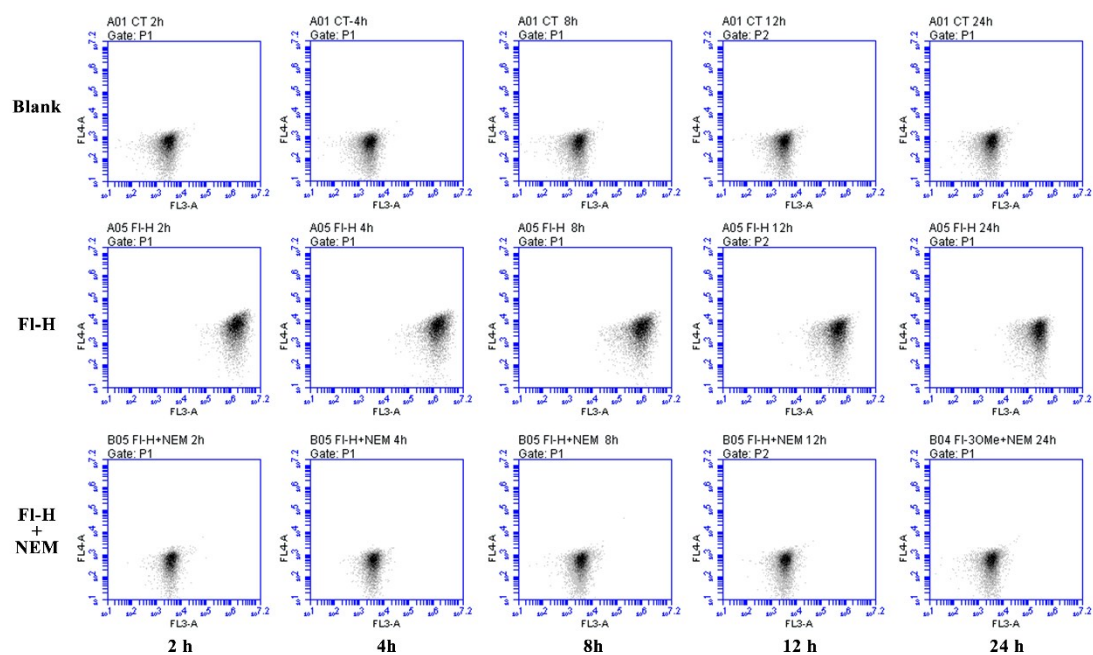

Figure S22 Photo stability scatter diagram of FI-H under illumination in cells by flow cytometry.

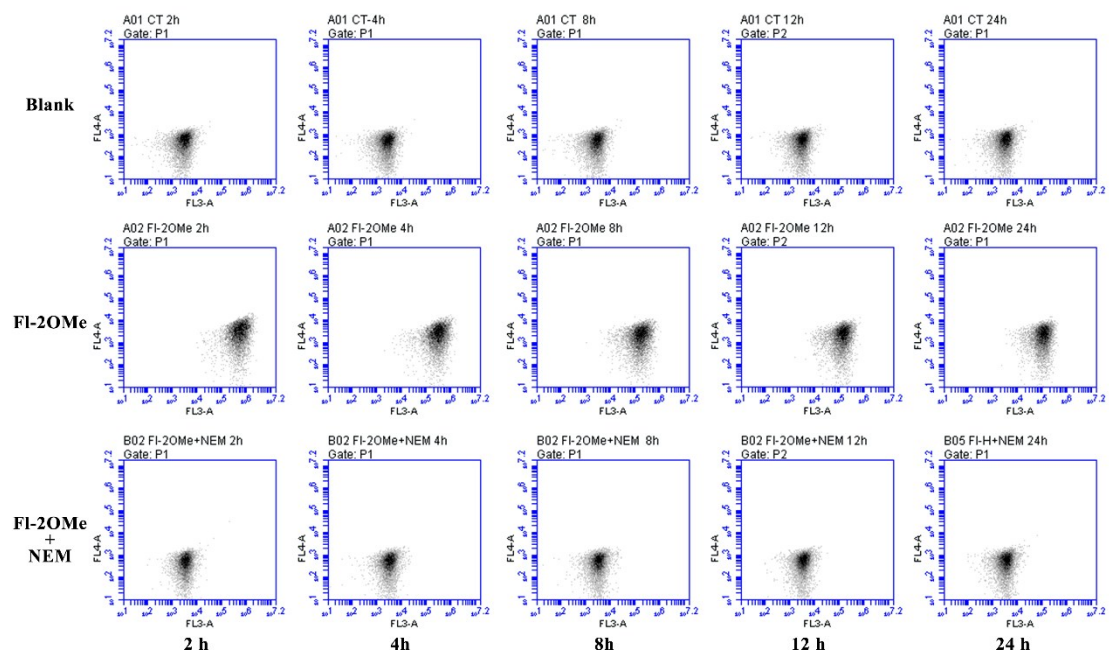

Figure S23 Photo stability scatter diagram of FI-2OMe under illumination in cells by flow cytometry.

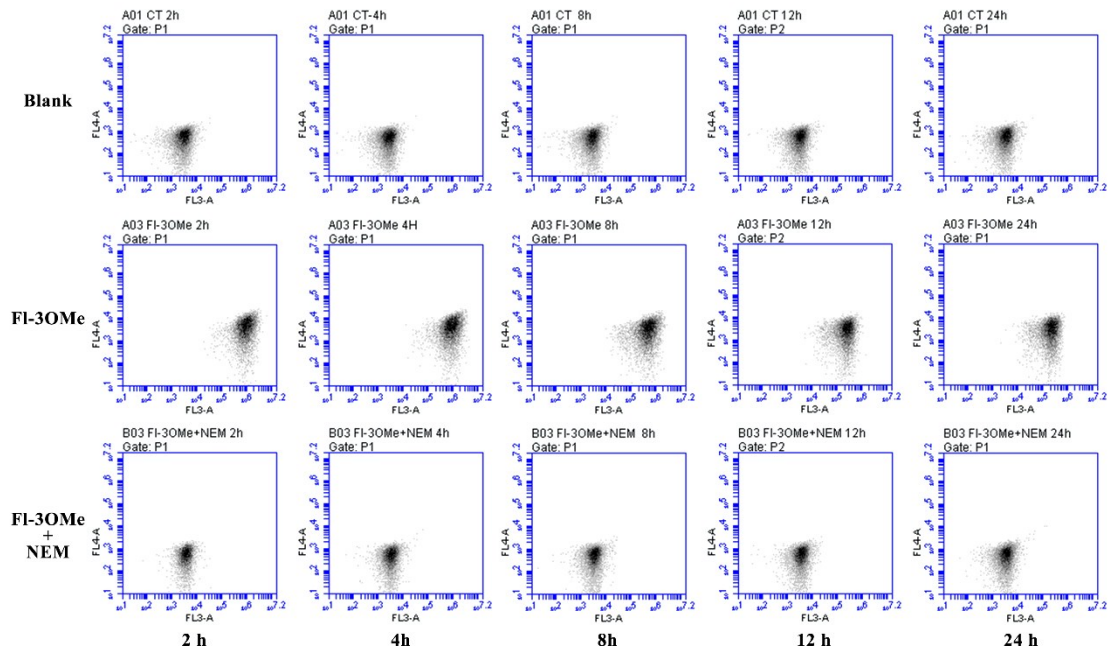

Figure S24 Photo stability scatter diagram of **FI-3OMe** under illumination in cells by flow cytometry.

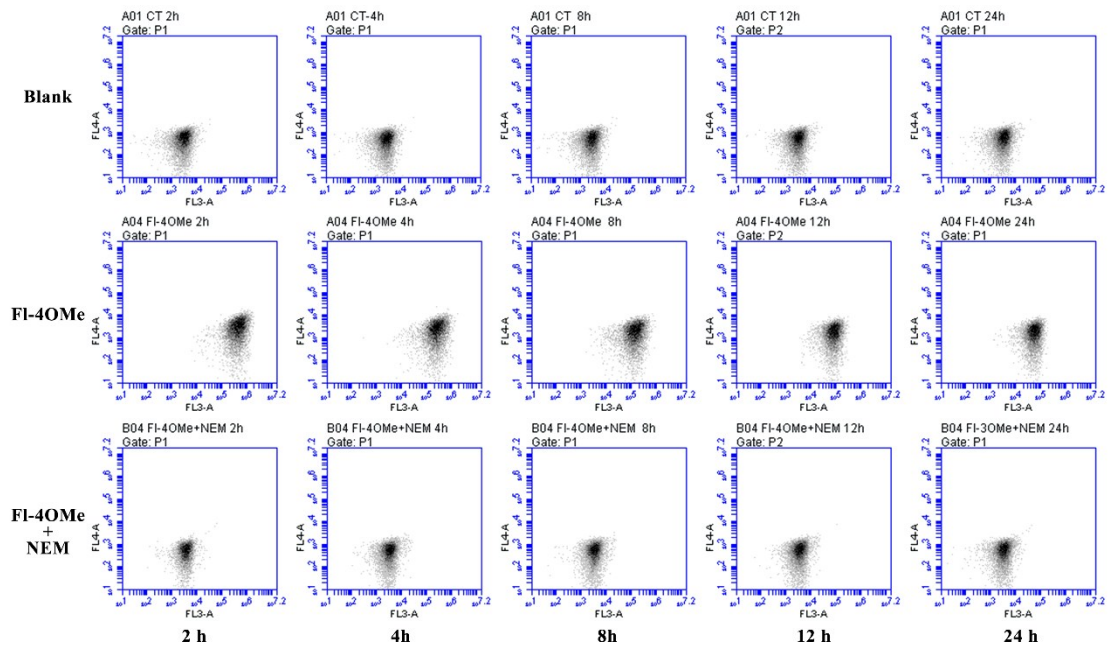

Figure S25 Photo stability scatter diagram of **FI-4OMe** under illumination in cells by flow cytometry.

#### 4. Cytotoxicity test

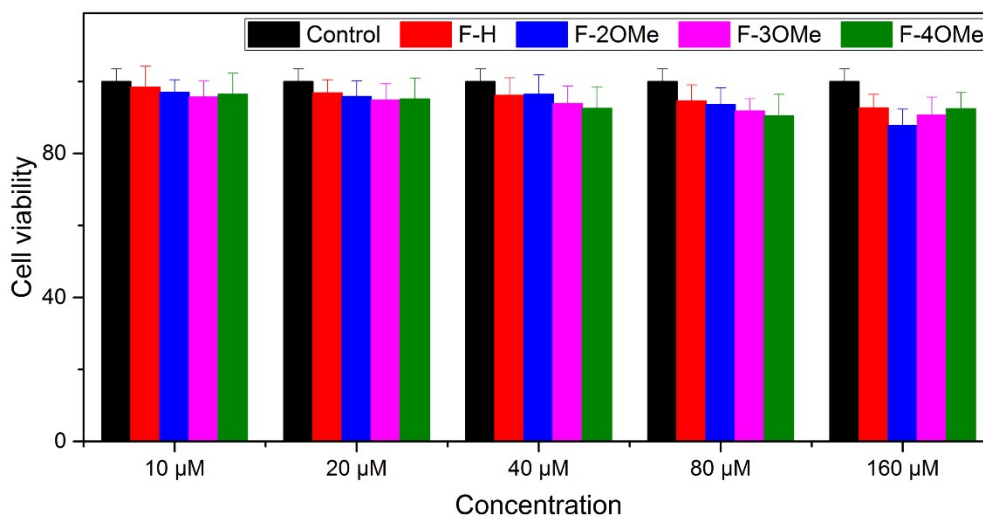

Figure S26. Cell viability on different concentration.

#### 5. Living mice imaging

The positive cell imaging results in MCF-7 cells encouraged us to pursue the suitability of our probes for monitoring GSH in living animals. We used Kunming mice as a model to assess the effectiveness of using probe **FI-H/2/3/4OMe** to detect GSH in a living organism (Figure S15-S18). Taking **FI-H** as an example, the mouse was given a hypodermic injection with the pure probe (0.5 mM, in 200 µL PBS buffer solution). After 5 min., an obvious enhancement of fluorescence was observed. The signal intensity increased gradually with time and tended to be stable after about 60 min. By comparison, mice treated with NEM (2 mM, in 100 µL PBS buffer solution) before probe injection showed only a negligible fluorescent emission. Mice treated with  $\alpha$ -LPA (2 mM, in 100 µL PBS buffer solution) prior to probe injection exhibited more intense fluorescence than the probe-only group. These results suggested that **FI-H/2/3/4OMe** are sensitive enough to detect basal levels of endogenous GSH produced without stimulation, and could tolerate abnormal GSH concentrations. These experiments have highlighted the utility of **FI-H/2/3/4OMe** for quantitative detection of GSH in living organisms.

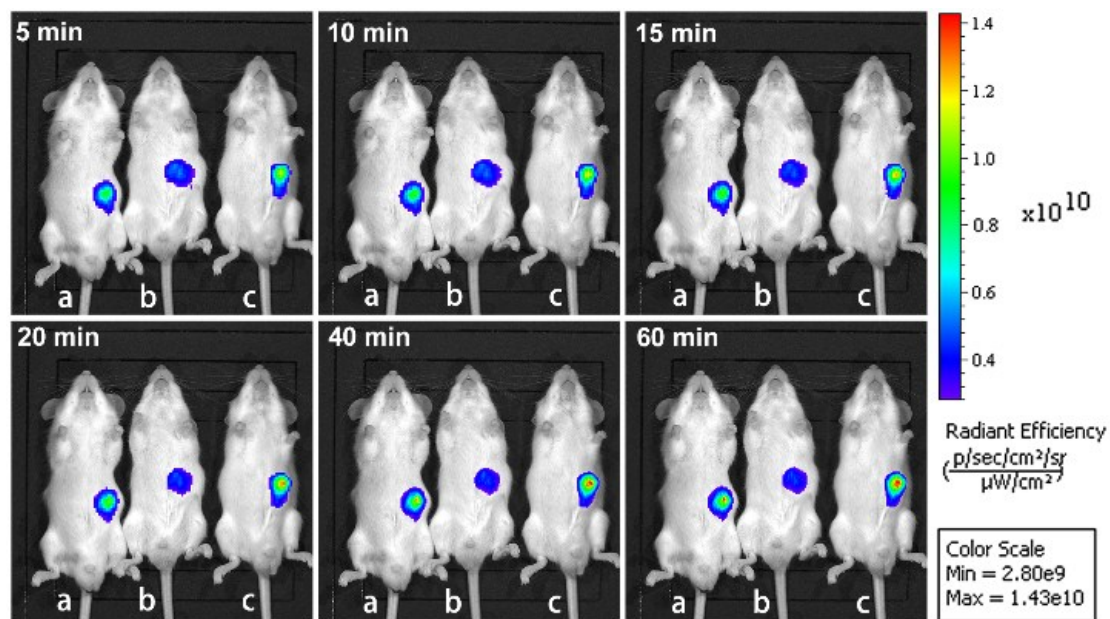

**Figure S27.** Living Mice imaging of probe **FI-H**+50 equiv GSH in 60 min. a) Mice inject with 1 mM probe **FI-H**; b) Mice inject with 2 mM NEM, then inject with 1 mM probe **FI-H**; c) Mice inject with 2 mM  $\alpha$ -LPA, then inject with 1 mM probe **FI-H**.

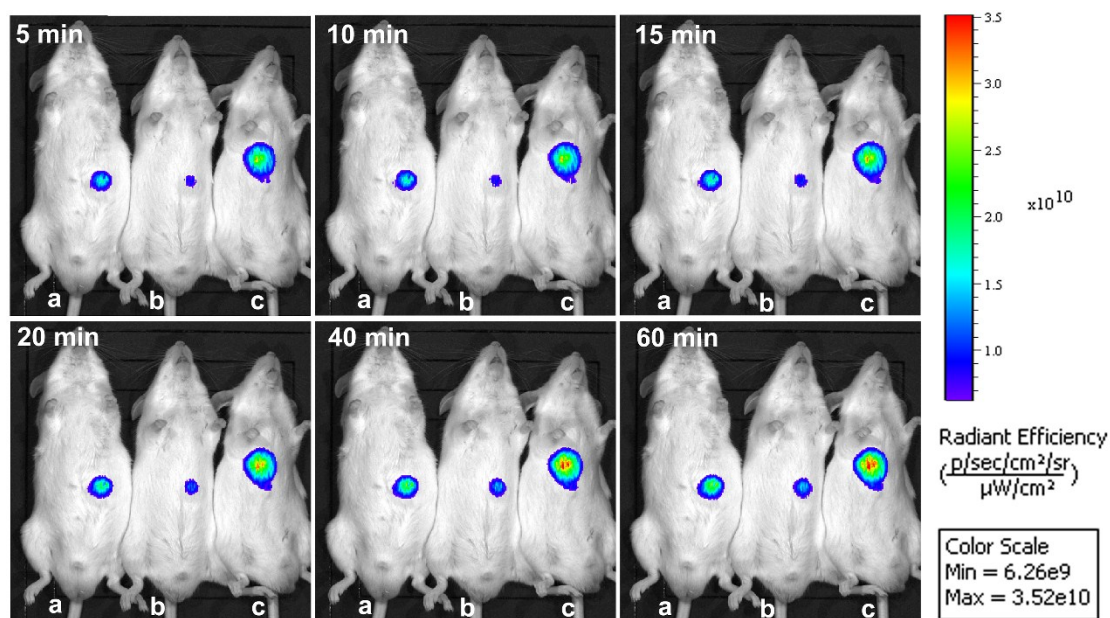

**Figure S28.** Living Mice imaging of probe **FI-2OMe**+50 equiv GSH in 60 min. a) Mice injected with 1 mM probe **FI-2OMe**; b) Mice inject with 2 mM NEM, then inject with 1 mM probe **FI-2OMe**; c) Mice inject with 2 mM  $\alpha$ -LPA, then inject with 1 mM probe **FI-2OMe**.



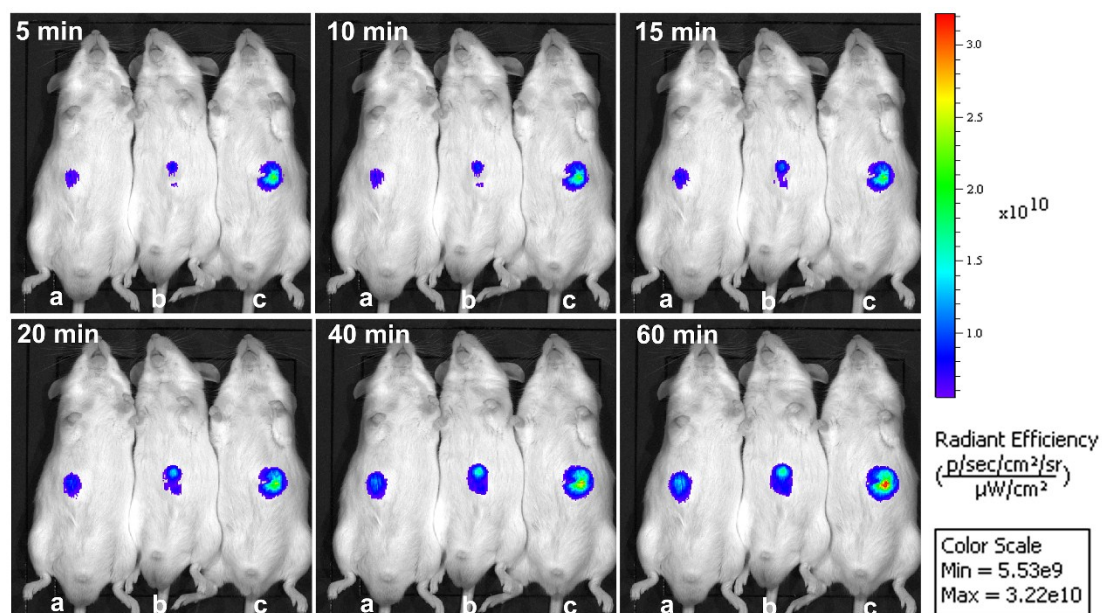

**Figure S29.** Living Mice imaging of probe **FI-3OMe**+50 equiv GSH in 60 min. a) Mice injected with 1 mM probe **FI-3OMe**; b) Mice inject with 2 mM NEM, then inject with 1 mM probe **FI-3OMe**; c) Mice inject with 2 mM  $\alpha$ -LPA, then inject with 1 mM probe **FI-3OMe**.

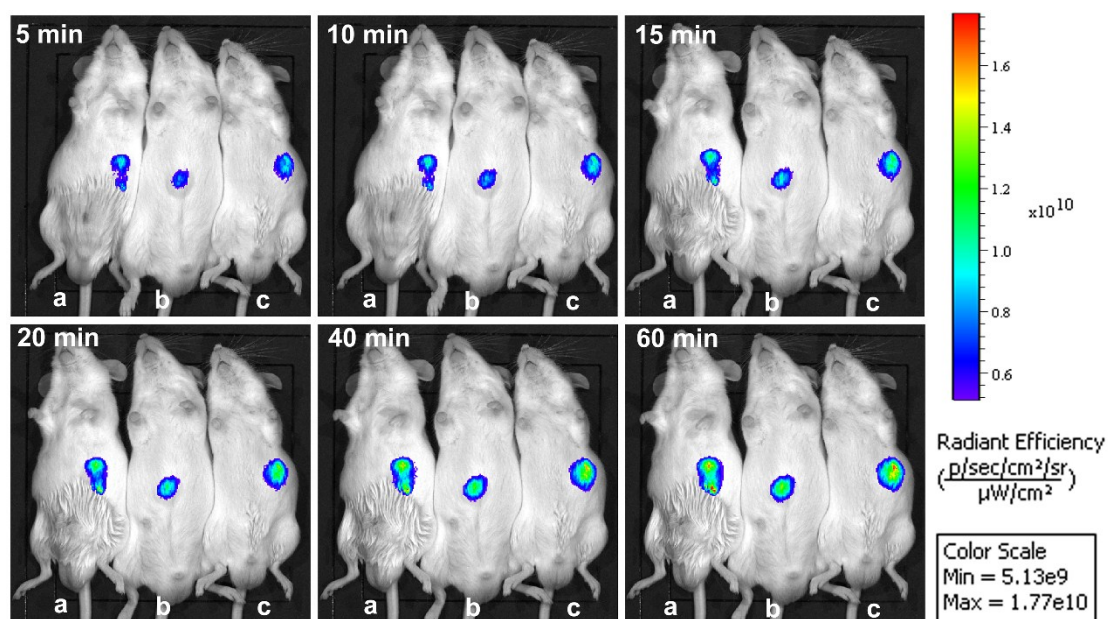

**Figure S30.** Living Mice imaging of probe **FI-4OMe**+50 equiv GSH in 60 min. a) Mice injected with 1 mM probe **FI-4OMe**; b) Mice inject with 2 mM NEM, then inject with 1 mM probe **FI-4OMe**; c) Mice inject with 2 mM  $\alpha$ -LPA, then inject with 1 mM probe **FI-4OMe**.

## 6. Computational details

DFT calculations have been applied to simulate the recognition process by comparing the properties of these probes. All the calculations were performed with B3LYP functional<sup>1</sup> and UB3LYP with a combination of basis of double- $\zeta$  quality consisting of 6-31G\*\* for C, H elements, 6-31+G\*\* for N, O, S elements on Gaussian 09 Program<sup>2</sup>. The optimized structures were confirmed to be local minimums due to the non-existence of imaginary frequency, and the environmental effect was included via PCM model with water as the solvent molecule.

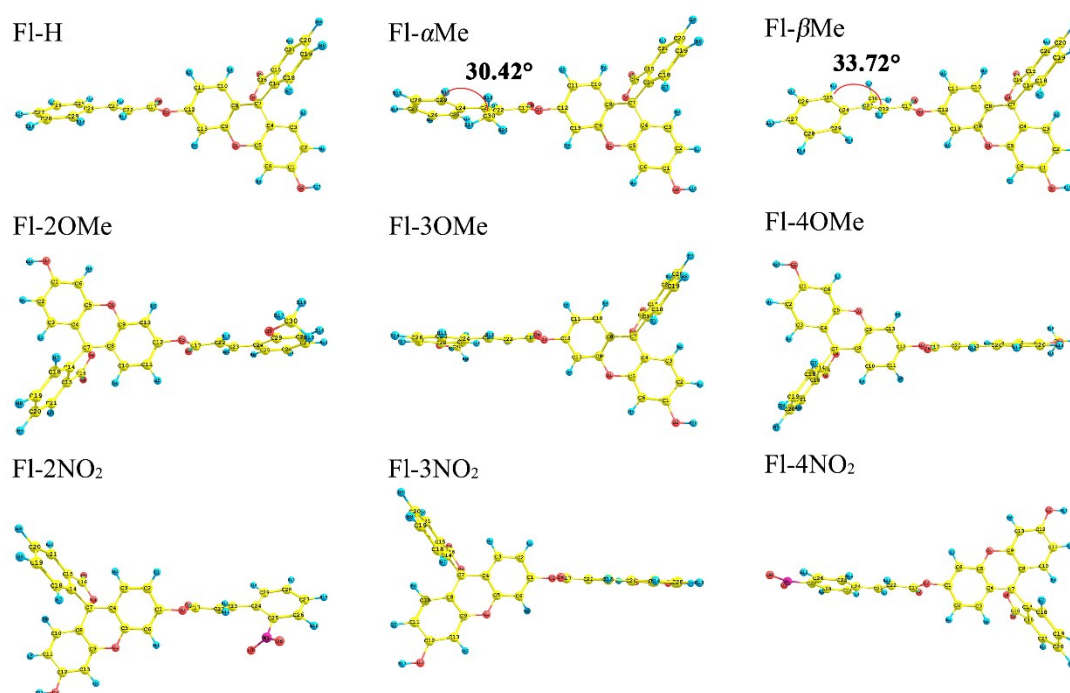

**Figure S31.** Calculated structure of designed GSH probes.

All these subsequent calculation such as front orbital theory analysis, energies analysis, Fukui function and NBO analysis were all obtained based on these structures.

## 7. NMR, MS spectra of all synthesized compounds

### 7.1 NMR spectra of all probes

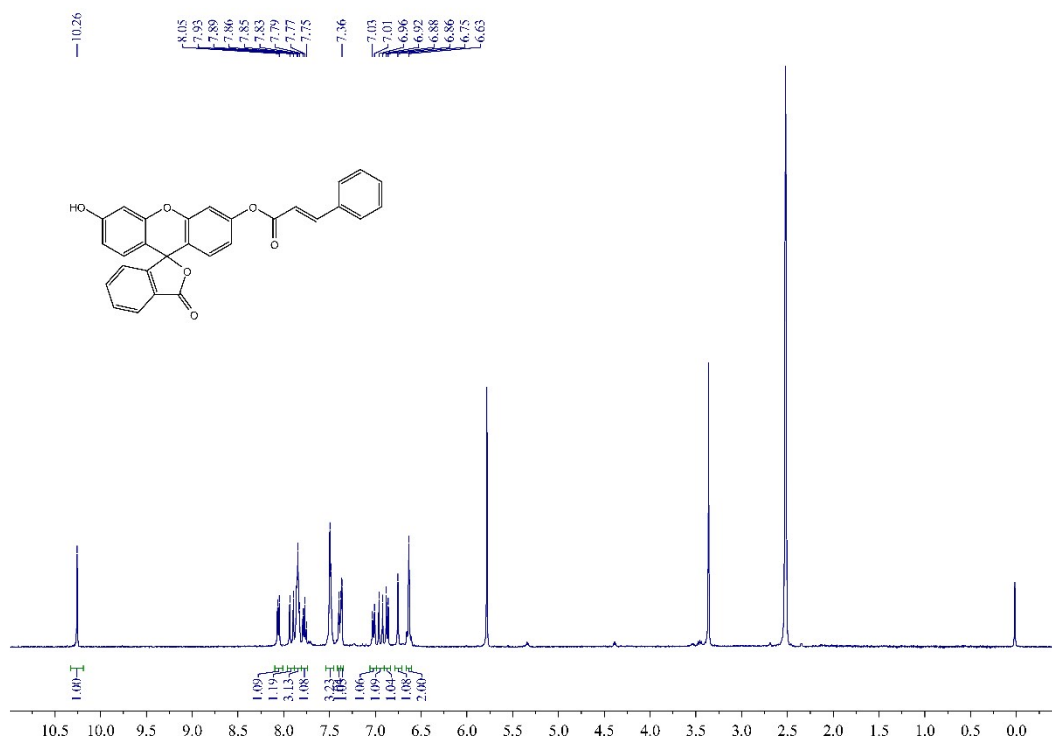

Figure S32. <sup>1</sup>H NMR of FI-H in d<sup>6</sup>-DMSO

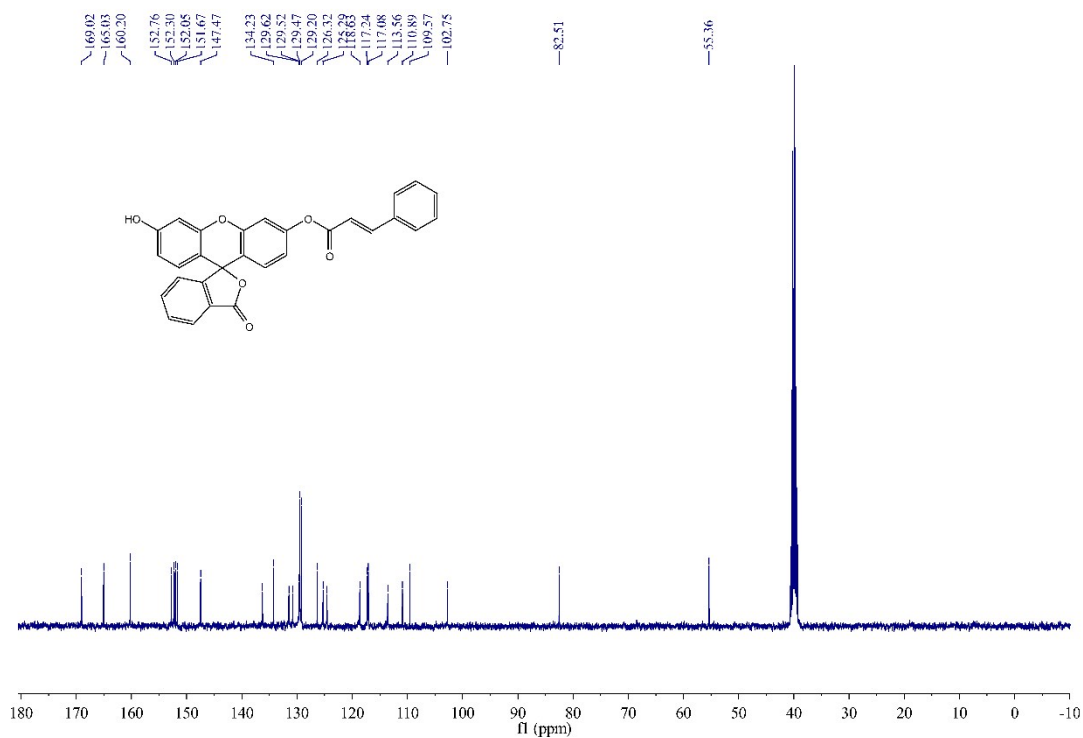

Figure S33. <sup>13</sup>C NMR of FI-H in d<sup>6</sup>-DMSO

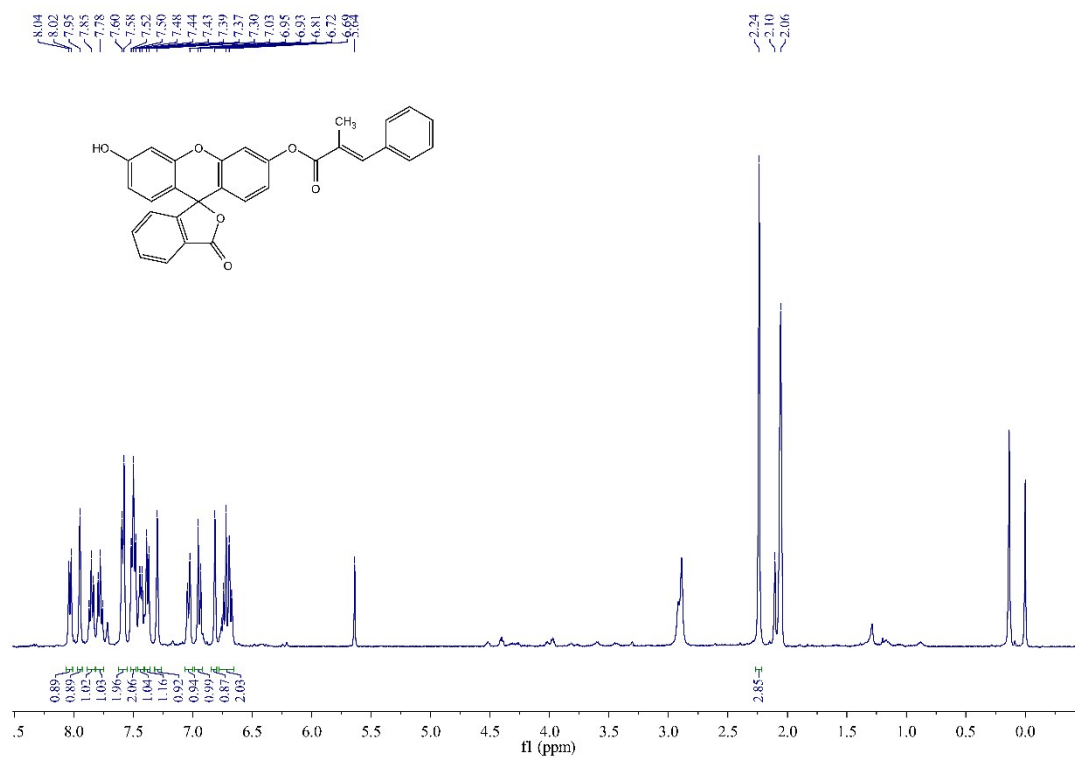

**Figure S34.** <sup>1</sup>H NMR of Fl-α-Me in (CD<sub>3</sub>)<sub>2</sub>CO

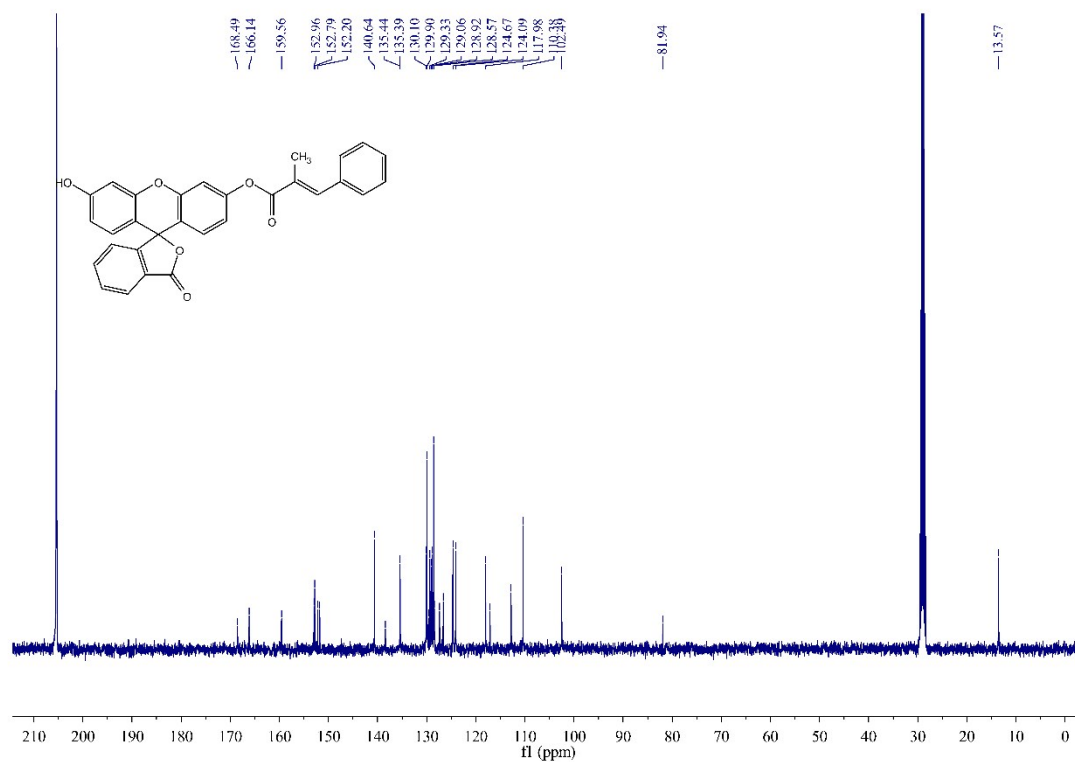

**Figure S35.** <sup>13</sup>C NMR of Fl-α-Me in (CD<sub>3</sub>)<sub>2</sub>CO

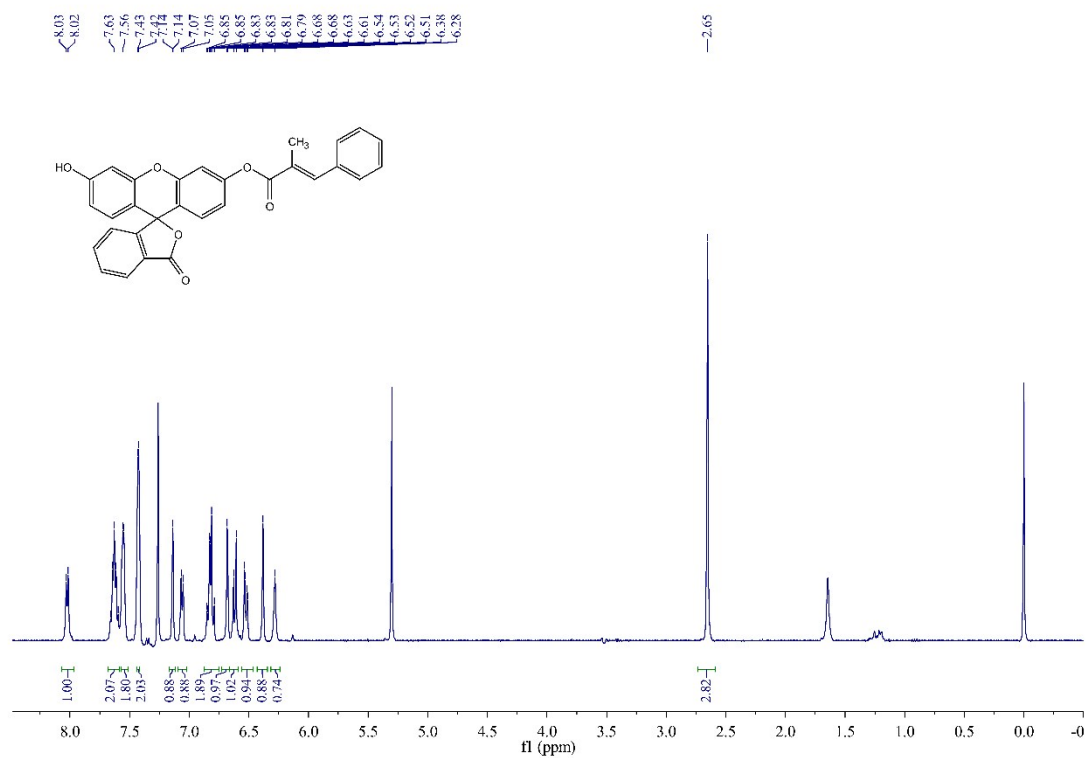

Figure S36.  $^1\text{H}$  NMR of FI- $\beta$ -Me in  $\text{CDCl}_3$

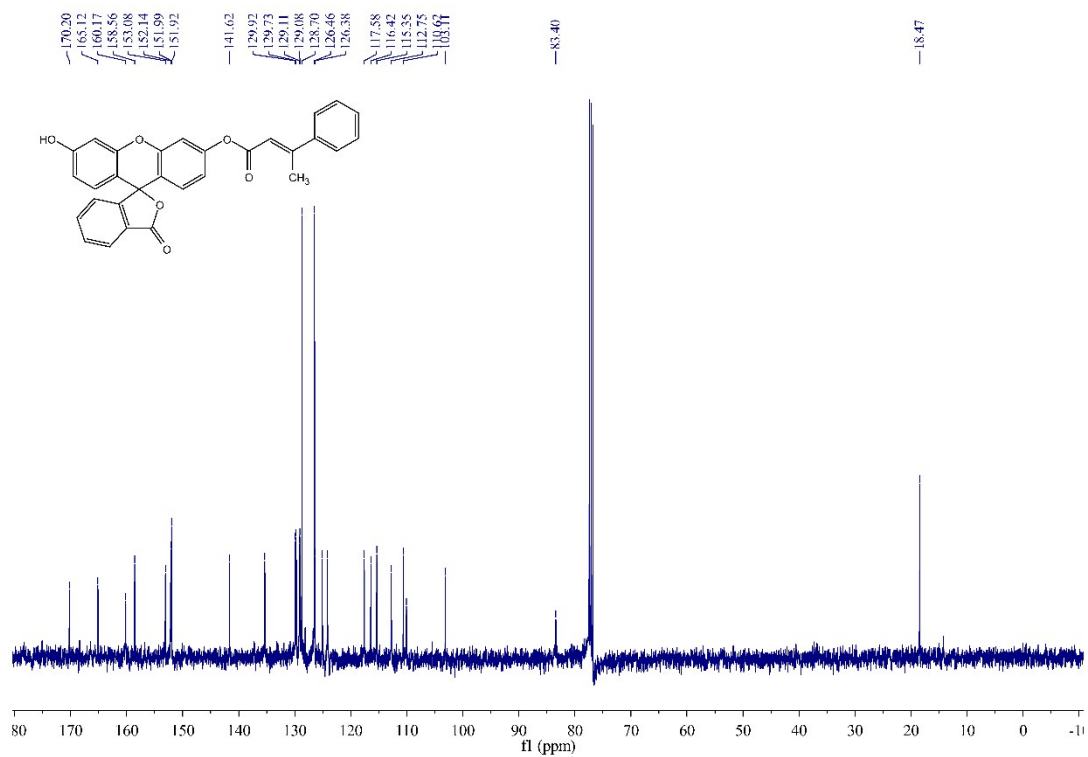

Figure S37.  $^{13}\text{C}$  NMR of FI- $\beta$ -Me in  $\text{CDCl}_3$

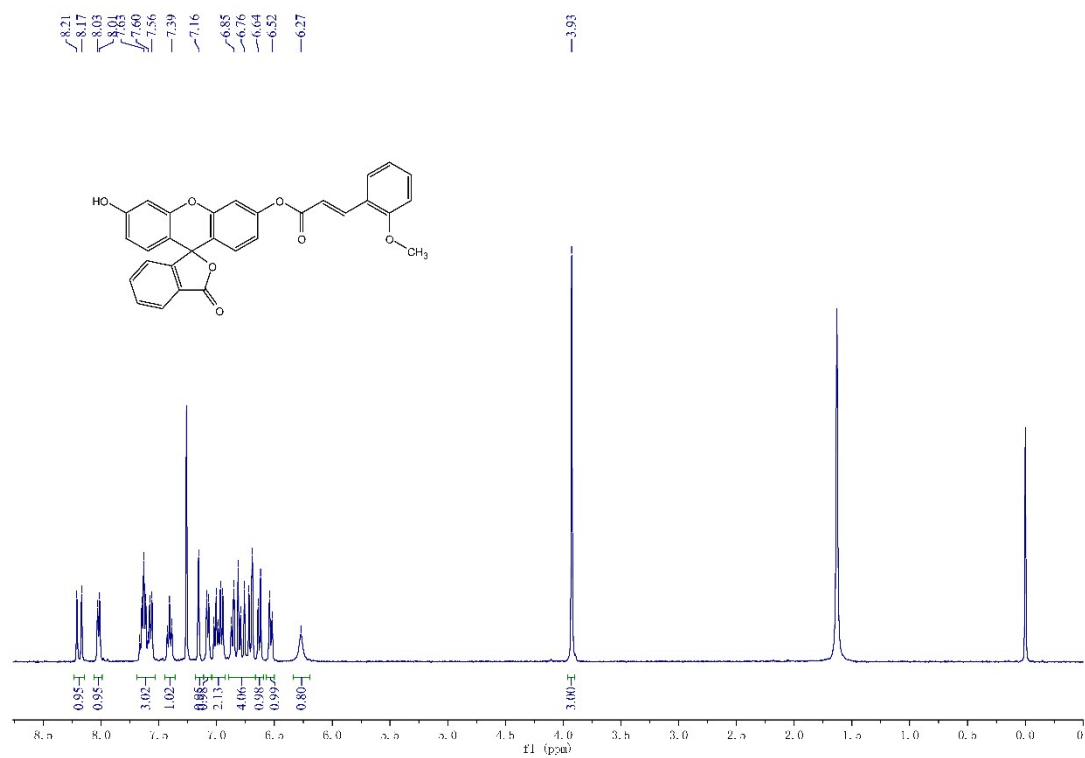

Figure S38. <sup>1</sup>H NMR of FI-2OMe in CDCl<sub>3</sub>

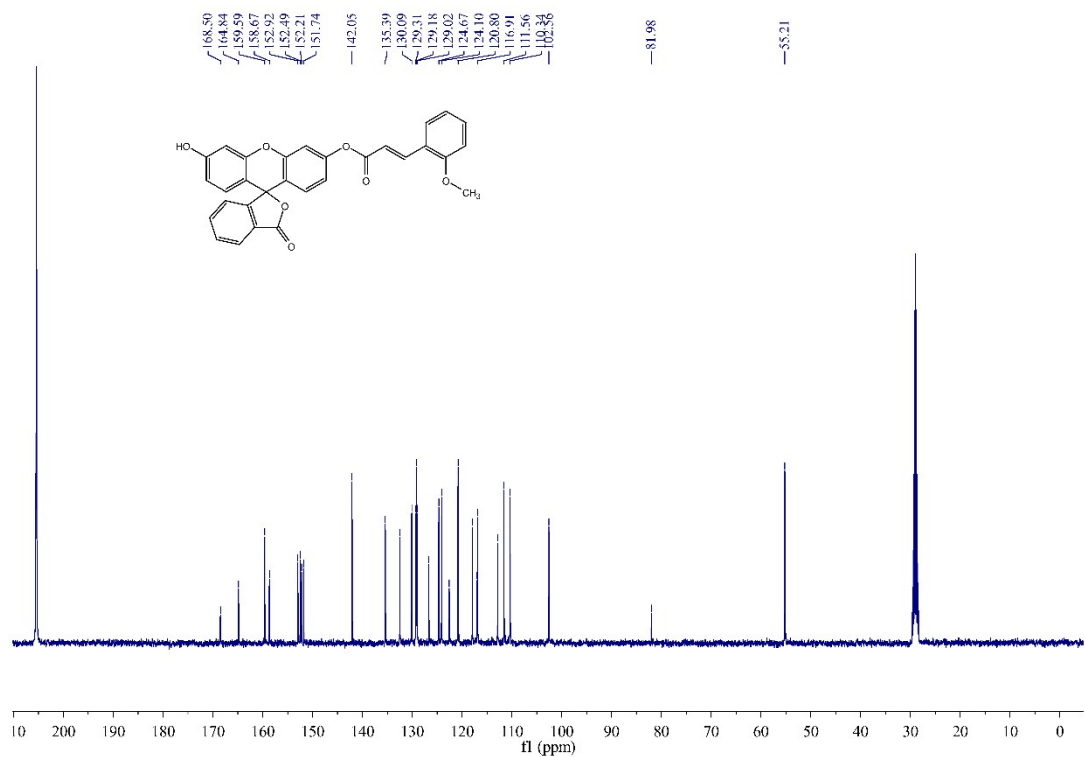

Figure S39. <sup>13</sup>C NMR of FI-2OMe in (CD<sub>3</sub>)<sub>2</sub>CO

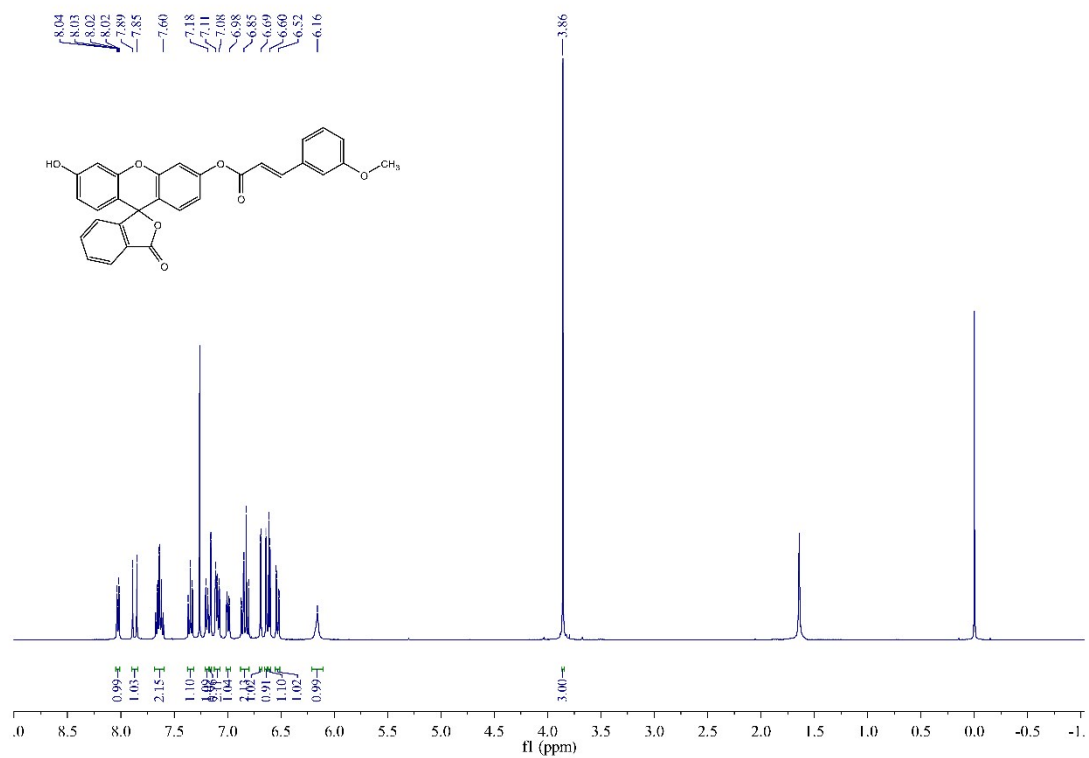

Figure S40. <sup>1</sup>H NMR of FI-3OMe in CDCl<sub>3</sub>

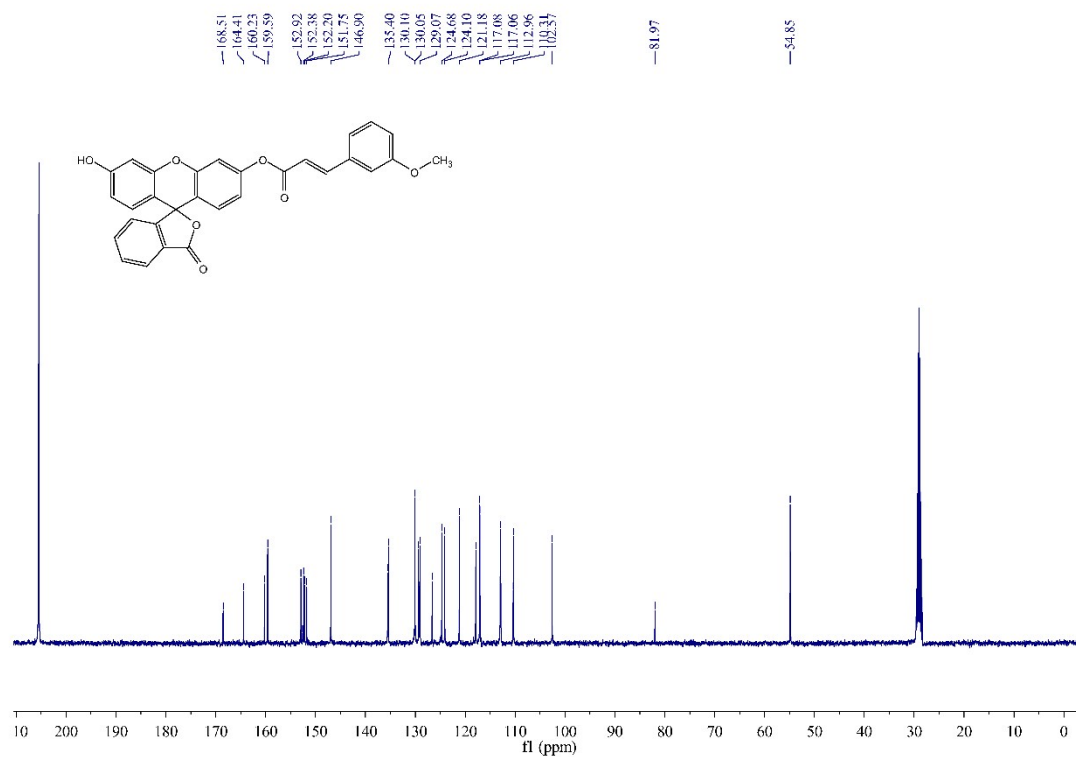

Figure S41. <sup>13</sup>C NMR of FI-3OMe in (CD<sub>3</sub>)<sub>2</sub>CO

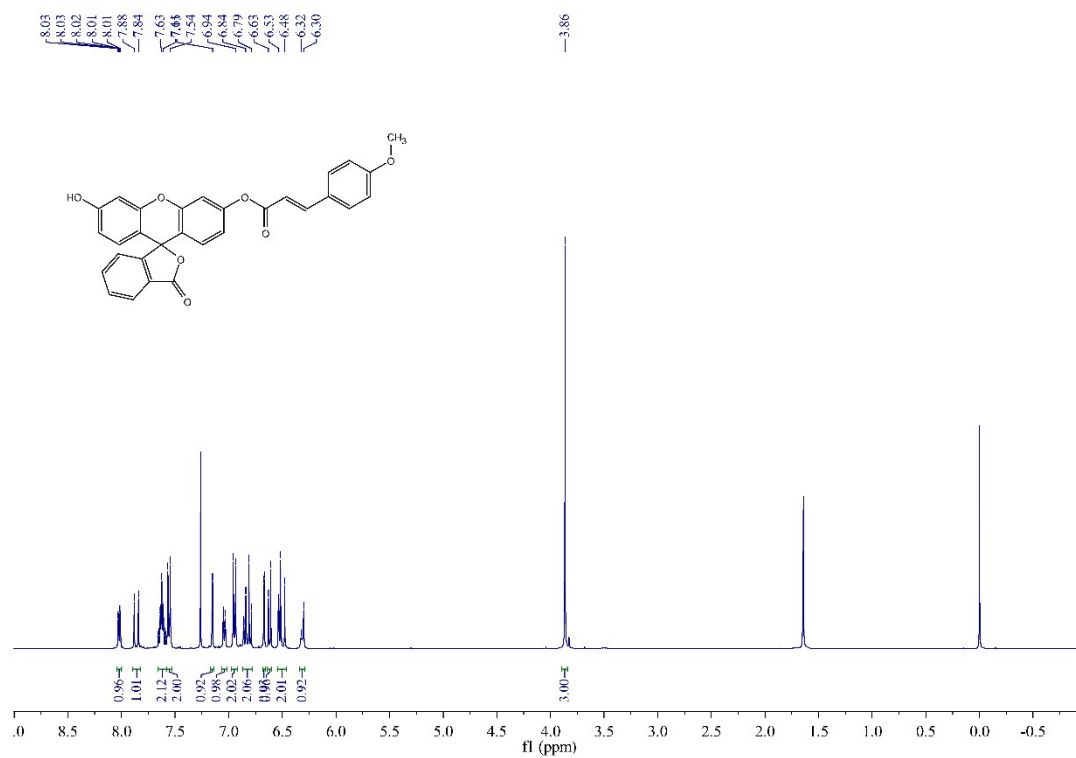

Figure S42. <sup>1</sup>H NMR of FI-4OMe in CDCl<sub>3</sub>

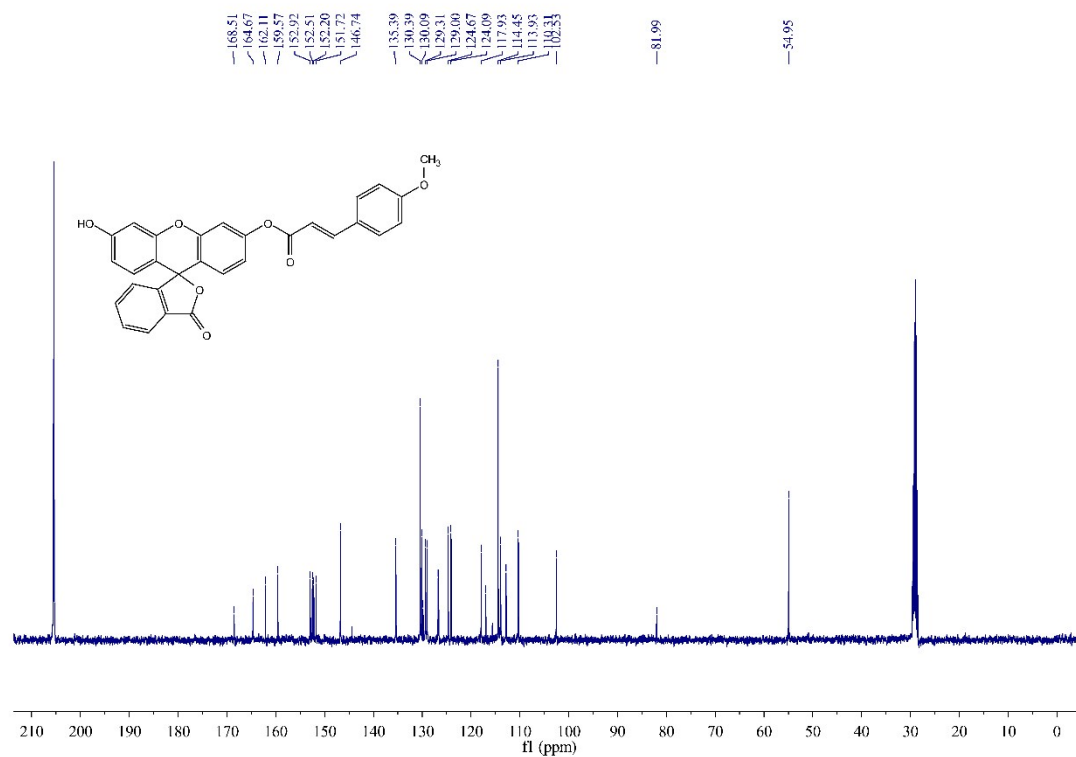

Figure S43. <sup>13</sup>C NMR of FI-4OMe in (CD<sub>3</sub>)<sub>2</sub>CO



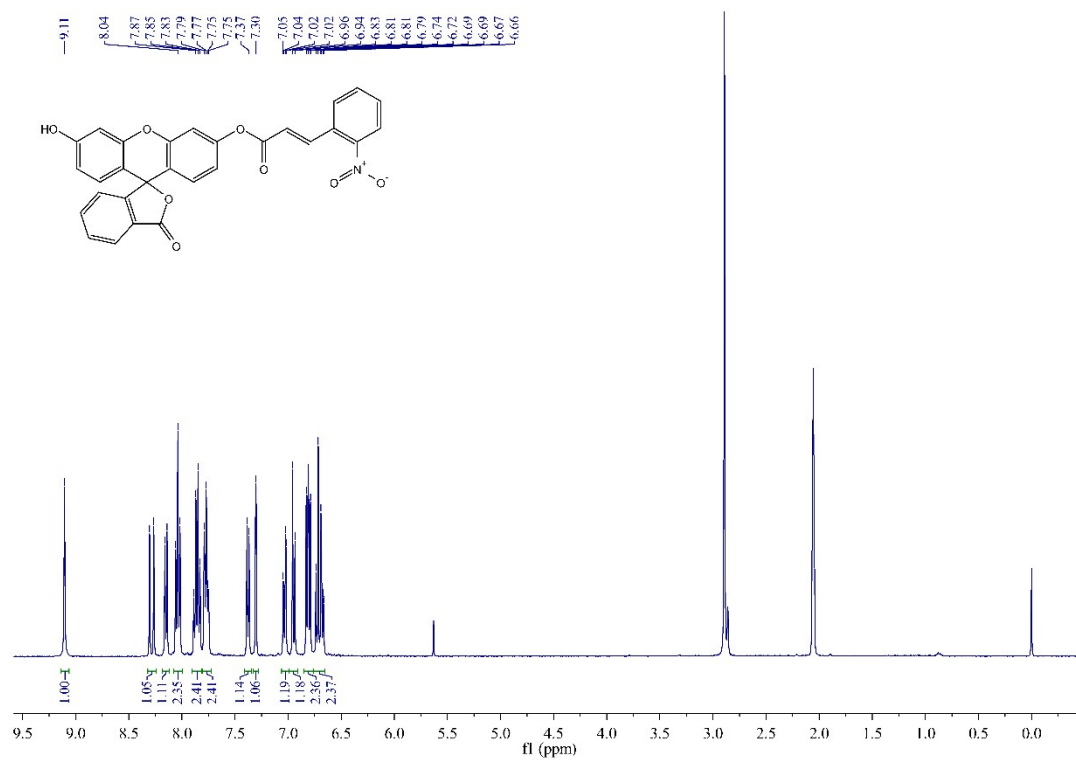

Figure S44. <sup>1</sup>H NMR of FI-2NO<sub>2</sub> in (CD<sub>3</sub>)<sub>2</sub>CO

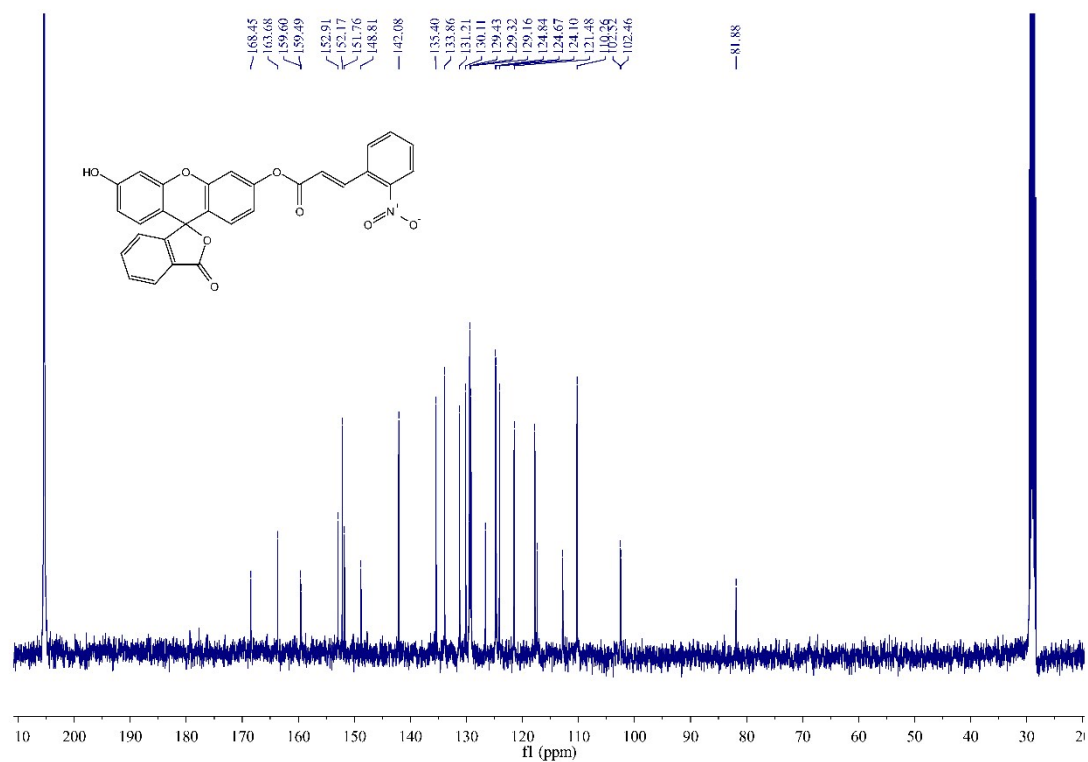

Figure S45. <sup>13</sup>C NMR of FI-2NO<sub>2</sub> in (CD<sub>3</sub>)<sub>2</sub>CO

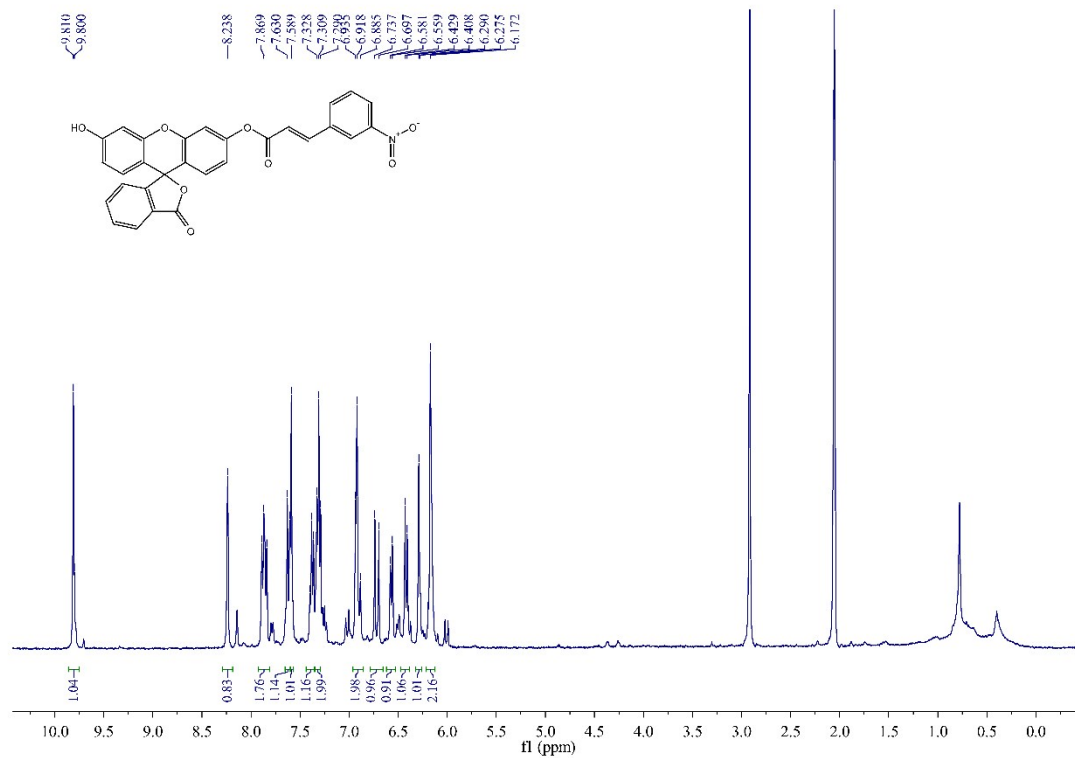

Figure S46. <sup>1</sup>H NMR of FI-3NO<sub>2</sub> in (CD<sub>3</sub>)<sub>2</sub>CO

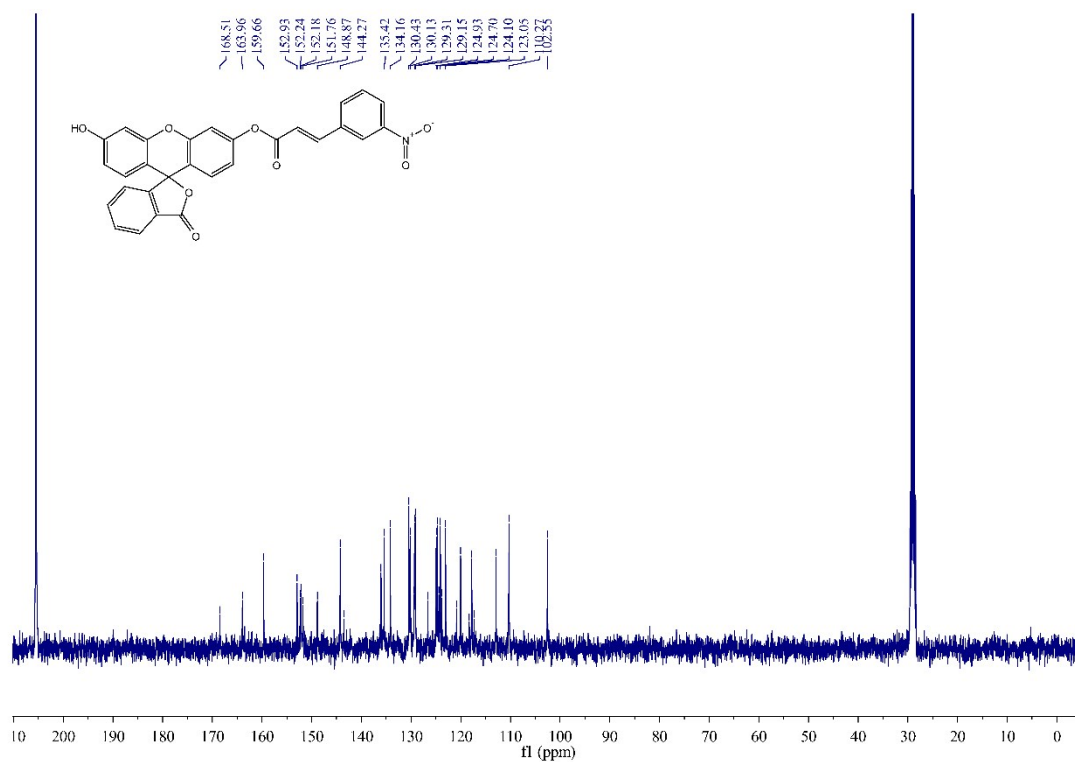

Figure S47. <sup>13</sup>C NMR of FI-3NO<sub>2</sub> in (CD<sub>3</sub>)<sub>2</sub>CO

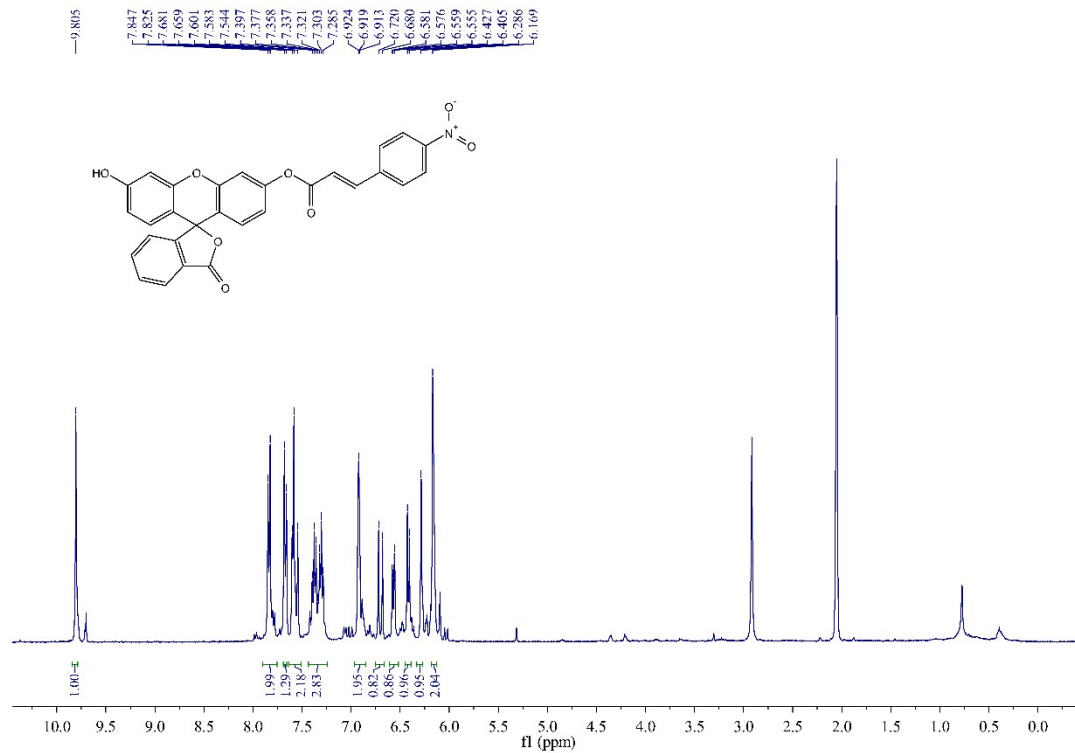

Figure S48. <sup>1</sup>H NMR of FI-4NO<sub>2</sub> in d<sup>6</sup>-DMSO

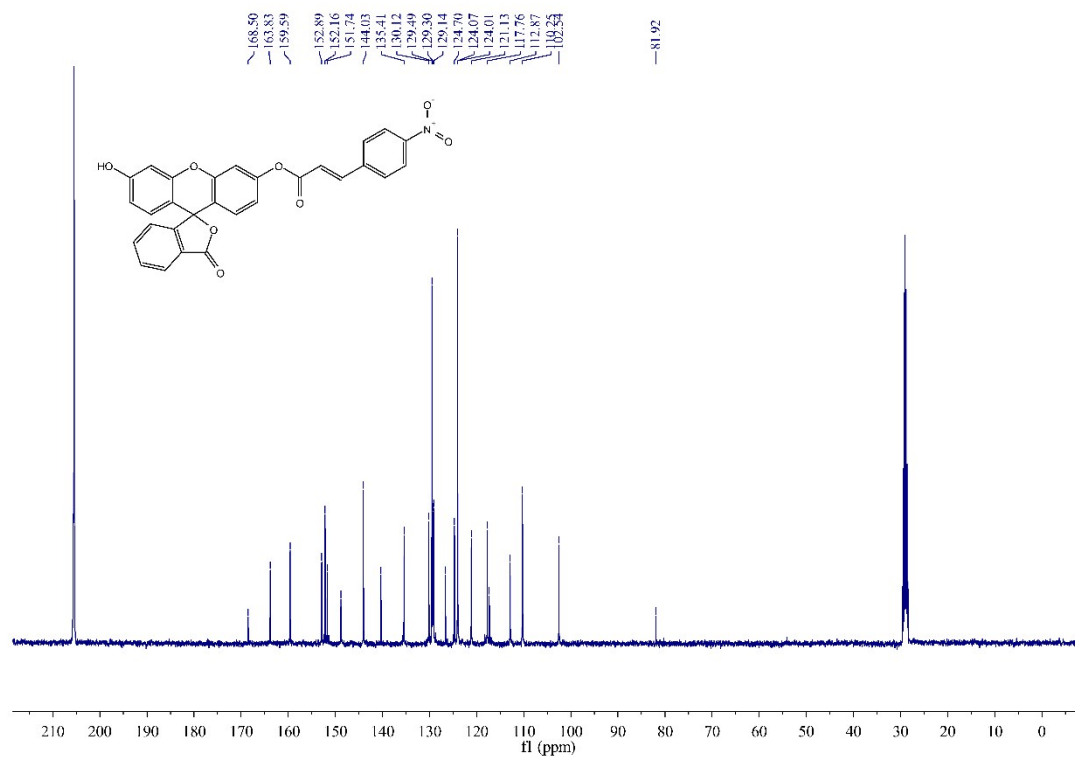

Figure S49. <sup>13</sup>C NMR of FI-4NO<sub>2</sub> in d<sup>6</sup>-DMSO

## 7.2 HRMS spectra of all probes

### Mass Spectrum List Report

**Analysis Info**  
Analysis Name E:\IAO\AD\x+\FI-Ea'dEa-µ%É;úEa'dEa+Ó«'aÉØµ%É;úµAD'zã''Ey%Y'Ea'dEa+Ó«'aÉØµ%É;úOEÆ×Ey%Yijianli-D  
Method tune\_low 50-500.m Operator NVVU  
Sample Name 320 Instrument / Ser# microTOF-Q II 10280  
Comment

**Acquisition Parameter**

|             |            |                       |           |                  |           |
|-------------|------------|-----------------------|-----------|------------------|-----------|
| Source Type | ESI        | Ion Polarity          | Negative  | Set Nebulizer    | 0.4 Bar   |
| Focus       | Not active | Set Capillary         | 3500 V    | Set Dry Heater   | 180 °C    |
| Scan Begin  | 50 m/z     | Set End Plate Offset  | -500 V    | Set Dry Gas      | 4.0 l/min |
| Scan End    | 1000 m/z   | Set Collision Cell RF | 110.0 Vpp | Set Divert Valve | Source    |

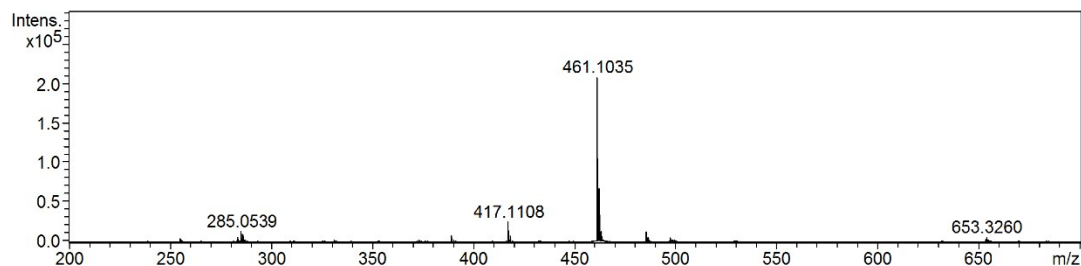

Figure S50. HRMS spectra of FI-H

### Mass Spectrum SmartFormula Report

**Analysis Info**  
Analysis Name E:\IAO\AD\x+\FI-Ea'dEa-µ%É;ú\DATA\MASS\A-Me-Ea'dEa+Ó«'aÉØµ%É;ú  
Method tune\_low 50-500.m Operator service  
Sample Name Instrument / Ser# microTOF-Q II 10280  
Comment

**Acquisition Parameter**

|             |          |                       |           |                  |           |
|-------------|----------|-----------------------|-----------|------------------|-----------|
| Source Type | ESI      | Ion Polarity          | Negative  | Set Nebulizer    | 0.3 Bar   |
| Focus       | Active   | Set Capillary         | 2600 V    | Set Dry Heater   | 180 °C    |
| Scan Begin  | 50 m/z   | Set End Plate Offset  | -500 V    | Set Dry Gas      | 4.0 l/min |
| Scan End    | 3000 m/z | Set Collision Cell RF | 110.0 Vpp | Set Divert Valve | Source    |

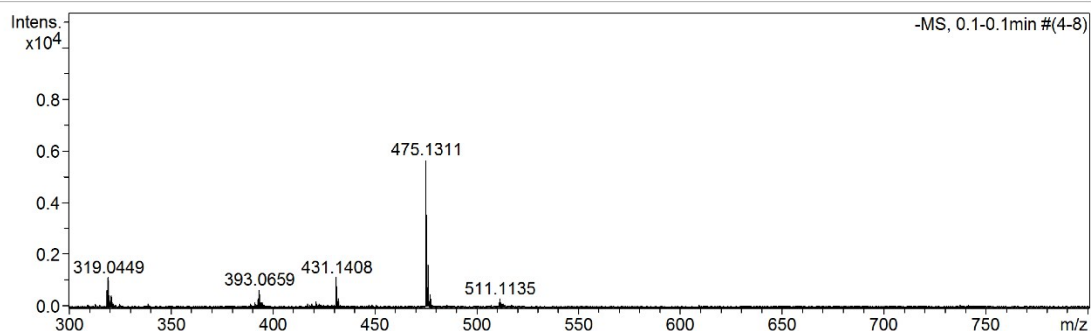

Figure S51. HRMS spectra of FI-a-Me

## Mass Spectrum List Report

### Analysis Info

Analysis Name C:\Users\lenovo\Desktop\lijianli-20171107-D6.d  
Method tune\_low 50-500.m  
Sample Name  
Comment

Acquisition Date 2017/11/7 15:47:52

Operator service  
Instrument / Ser# micrOTOF-Q II 10280

### Acquisition Parameter

|             |          |                       |           |                  |           |
|-------------|----------|-----------------------|-----------|------------------|-----------|
| Source Type | ESI      | Ion Polarity          | Negative  | Set Nebulizer    | 0.3 Bar   |
| Focus       | Active   | Set Capillary         | 2600 V    | Set Dry Heater   | 180 °C    |
| Scan Begin  | 50 m/z   | Set End Plate Offset  | -500 V    | Set Dry Gas      | 4.0 l/min |
| Scan End    | 3000 m/z | Set Collision Cell RF | 110.0 Vpp | Set Divert Valve | Source    |

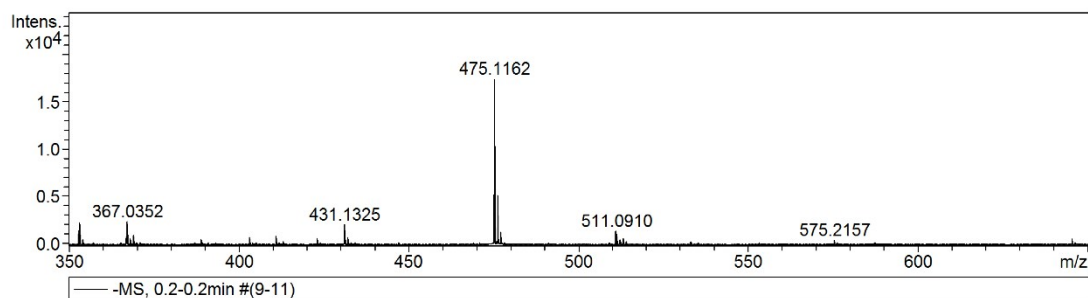

Figure S52. HRMS spectra of FI- $\beta$ -Me

## Mass Spectrum List Report

### Analysis Info

Analysis Name E:\AOAD\\*+F\Ea'oEa-µE; 'uEa'oEa+O«'aE0µE; 'uµAD'z'a"1Ey%Y2-OMeEa'oEa+O«'aE0µE; 'uOEÆ×Ey%Y  
Method 2.1e-Nov-2016-05-05-Flup-lijl-wangzhaohui-D7.d  
Sample Name 20160622  
Comment

Acquisition Date 2016/10/21 10:29:44

Operator NWU  
Instrument / Ser# micrOTOF-Q II 10280

### Acquisition Parameter

|             |            |                       |           |                  |           |
|-------------|------------|-----------------------|-----------|------------------|-----------|
| Source Type | ESI        | Ion Polarity          | Negative  | Set Nebulizer    | 0.4 Bar   |
| Focus       | Not active | Set Capillary         | 3500 V    | Set Dry Heater   | 180 °C    |
| Scan Begin  | 50 m/z     | Set End Plate Offset  | -500 V    | Set Dry Gas      | 4.0 l/min |
| Scan End    | 3000 m/z   | Set Collision Cell RF | 110.0 Vpp | Set Divert Valve | Source    |

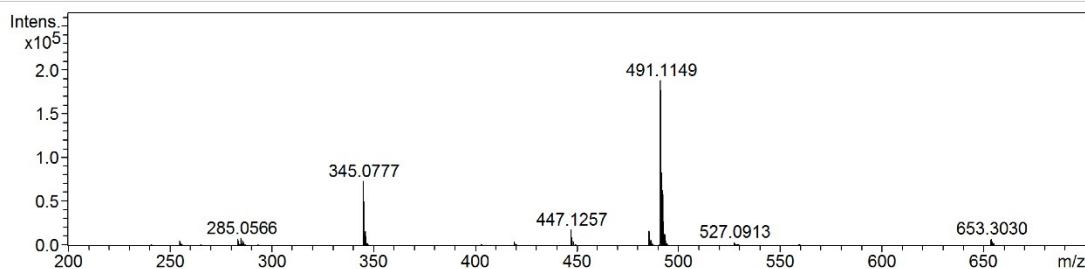

Figure S53. HRMS spectra of FI-2OMe

# Mass Spectrum List Report

## Analysis Info

Analysis Name E:\AOAD\\*+FI-Ea'oEa-µE; úEa'oEa+O«'aEØµE; úµAD/za''Ey%Y3-OMeEa'oEa+O«'aEØµE; úOÉ/E×Éy%Y  
Method Full-Scan  
Sample Name 20160622  
Comment  
Acquisition Date 2016/10/21 10:31:13  
Operator NWU  
Instrument / Ser# micrOTOF-Q II 10280

## Acquisition Parameter

|             |            |                       |           |                  |           |
|-------------|------------|-----------------------|-----------|------------------|-----------|
| Source Type | ESI        | Ion Polarity          | Negative  | Set Nebulizer    | 0.4 Bar   |
| Focus       | Not active | Set Capillary         | 3500 V    | Set Dry Heater   | 180 °C    |
| Scan Begin  | 50 m/z     | Set End Plate Offset  | -500 V    | Set Dry Gas      | 4.0 l/min |
| Scan End    | 3000 m/z   | Set Collision Cell RF | 110.0 Vpp | Set Divert Valve | Source    |

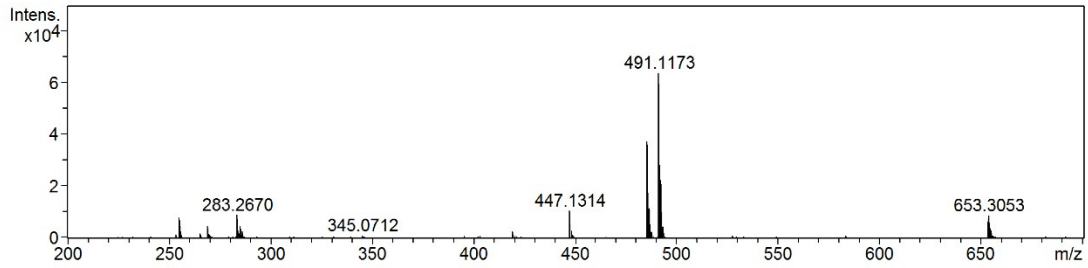

Figure S54. HRMS spectra of FI-3OMe

# Mass Spectrum List Report

## Analysis Info

Analysis Name E:\AOAD\\*+FI-Ea'oEa-µE; úEa'oEa+O«'aEØµE; úµAD/za''Ey%Y4-OMeEa'oEa+O«'aEØµE; úOÉ/E×Éy%Y  
Method Full-Scan  
Sample Name < No Sample >  
Comment  
Acquisition Date 2017/3/10 15:34:16  
Operator NWU  
Instrument / Ser# micrOTOF-Q II 10280

## Acquisition Parameter

|             |            |                       |           |                  |           |
|-------------|------------|-----------------------|-----------|------------------|-----------|
| Source Type | ESI        | Ion Polarity          | Negative  | Set Nebulizer    | 0.4 Bar   |
| Focus       | Not active | Set Capillary         | 3500 V    | Set Dry Heater   | 180 °C    |
| Scan Begin  | 50 m/z     | Set End Plate Offset  | -500 V    | Set Dry Gas      | 4.0 l/min |
| Scan End    | 3000 m/z   | Set Collision Cell RF | 110.0 Vpp | Set Divert Valve | Source    |

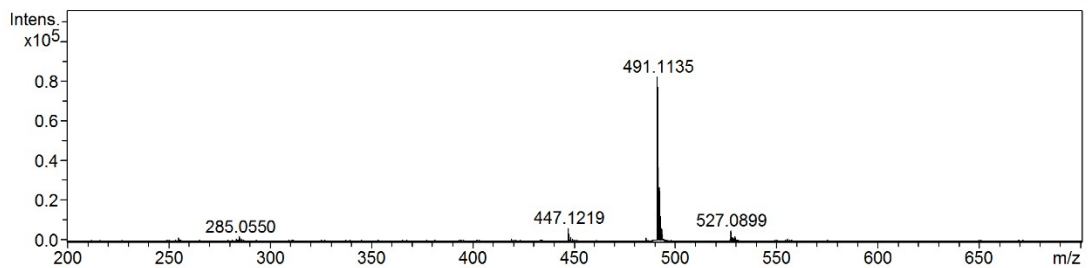

Figure S55. HRMS spectra of FI-4OMe

## Mass Spectrum List Report

### Analysis Info

Analysis Name E:\ÄÖÅÐ'x+\FI-Èá'ðÈá-µ¥Èj'ú\DATA\MASS\2-NO2-Èá'ðÈá+Ó«'áÈØµ¥Èj'ú\jl-Liquanquan-2-Ìð»ù-µ¥.d  
Method tune\_low 50-500.m  
Sample Name  
Comment

Acquisition Date 2017/5/22 11:29:43

Operator NWU

Instrument / Ser# micrOTOF-Q II 10280

### Acquisition Parameter

|             |            |                       |           |                  |           |
|-------------|------------|-----------------------|-----------|------------------|-----------|
| Source Type | ESI        | Ion Polarity          | Negative  | Set Nebulizer    | 0.4 Bar   |
| Focus       | Not active | Set Capillary         | 3500 V    | Set Dry Heater   | 180 °C    |
| Scan Begin  | 50 m/z     | Set End Plate Offset  | -500 V    | Set Dry Gas      | 4.0 l/min |
| Scan End    | 1000 m/z   | Set Collision Cell RF | 110.0 Vpp | Set Divert Valve | Source    |

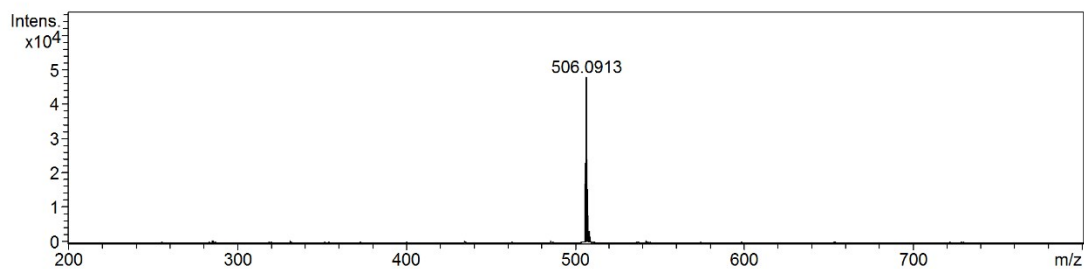

Figure S56. HRMS spectra of FI-2NO<sub>2</sub>

## Mass Spectrum List Report

### Analysis Info

Analysis Name E:\ÄÖÅÐ'x+\FI-Èá'ðÈá-µ¥Èj'ú\DATA\MASS\3-NO2-Èá'ðÈá+Ó«'áÈØµ¥Èj'ú\jl-Liquanquan-B22-3NO2-µ¥.d  
Method tune\_low 50-500.m  
Sample Name  
Comment

Acquisition Date 2017/5/22 11:31:11

Operator NWU

Instrument / Ser# micrOTOF-Q II 10280

### Acquisition Parameter

|             |            |                       |           |                  |           |
|-------------|------------|-----------------------|-----------|------------------|-----------|
| Source Type | ESI        | Ion Polarity          | Negative  | Set Nebulizer    | 0.4 Bar   |
| Focus       | Not active | Set Capillary         | 3500 V    | Set Dry Heater   | 180 °C    |
| Scan Begin  | 50 m/z     | Set End Plate Offset  | -500 V    | Set Dry Gas      | 4.0 l/min |
| Scan End    | 1000 m/z   | Set Collision Cell RF | 110.0 Vpp | Set Divert Valve | Source    |

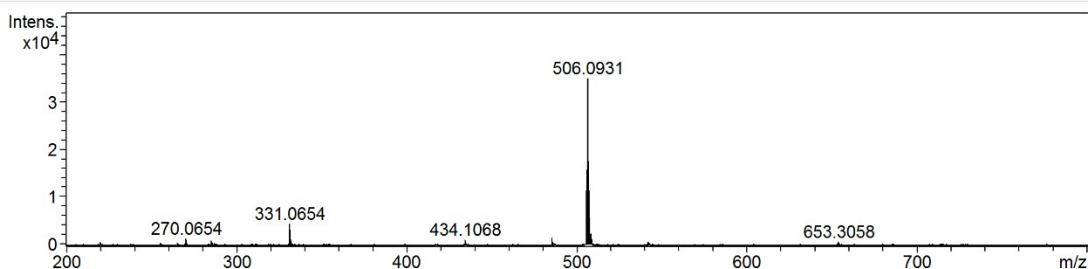

Figure S57. HRMS spectra of FI-3NO<sub>2</sub>

## Mass Spectrum List Report

### Analysis Info

Analysis Name E:\ÄÖÅÐ'x+\FI-Èá'ðÈá-µ%È; 'ú\DATA\MASS\4-NO2-Èá'ðÈá+Ó«'ãÈØµ%È; 'ú\jl-Liquanquan-B23-4NO2-µ%.d  
Method tune\_low 50-500.m  
Sample Name  
Comment

Acquisition Date 2017/5/22 11:31:43

Operator NWU

Instrument / Ser# micrOTOF-Q II 10280

### Acquisition Parameter

|             |            |                       |           |                  |           |
|-------------|------------|-----------------------|-----------|------------------|-----------|
| Source Type | ESI        | Ion Polarity          | Negative  | Set Nebulizer    | 0.4 Bar   |
| Focus       | Not active | Set Capillary         | 3500 V    | Set Dry Heater   | 180 °C    |
| Scan Begin  | 50 m/z     | Set End Plate Offset  | -500 V    | Set Dry Gas      | 4.0 l/min |
| Scan End    | 1000 m/z   | Set Collision Cell RF | 110.0 Vpp | Set Divert Valve | Source    |

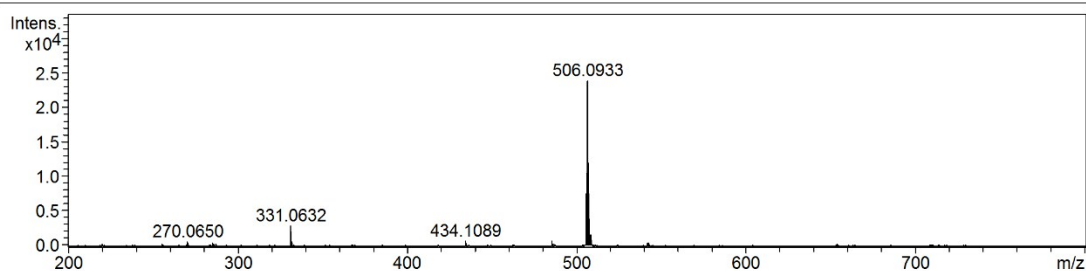

Figure S58. HRMS spectra of FI-4NO<sub>2</sub>

### References:

1. Becke, A. D., Density-functional thermochemistry. III. The role of exact exchange. *Journal of Chemical Physics* **1993**, *98* (7), 5648.
2. Frisch, M. J.; Trucks, G. W.; Schlegel, H. B.; Scuseria, G. E.; Robb, M. A.; Cheeseman, J. R.; Scalmani, G.; Barone, V.; Mennucci, B.; Petersson, G. A.; Nakatsuji, H.; Caricato, M.; Li, X.; Hratchian, H. P.; Izmaylov, A. F.; Bloino, J.; Zheng, G.; Sonnenberg, J. L.; Hada, M.; Ehara, M.; Toyota, K.; Fukuda, R.; Hasegawa, J.; Ishida, M.; Nakajima, T.; Honda, Y.; Kitao, O.; Nakai, H.; Vreven, T.; Montgomery Jr., J. A.; Peralta, J. E.; Ogliaro, F.; Bearpark, M. J.; Heyd, J.; Brothers, E. N.; Kudin, K. N.; Staroverov, V. N.; Kobayashi, R.; Normand, J.; Raghavachari, K.; Rendell, A. P.; Burant, J. C.; Iyengar, S. S.; Tomasi, J.; Cossi, M.; Rega, N.; Millam, N. J.; Klene, M.; Knox, J. E.; Cross, J. B.; Bakken, V.; Adamo, C.; Jaramillo, J.; Gomperts, R.; Stratmann, R. E.; Yazyev, O.; Austin, A. J.; Cammi, R.; Pomelli, C.; Ochterski, J. W.; Martin, R. L.; Morokuma, K.; Zakrzewski, V. G.; Voth, G. A.; Salvador, P.; Dannenberg, J. J.; Dapprich, S.; Daniels, A. D.; Farkas, Ö.; Foresman, J. B.; Ortiz, J. V.; Cioslowski, J.; Fox, D. J. *Gaussian 09*, Gaussian, Inc.: Wallingford, CT, USA, 2009.
